# Supplementary material for: Reference gene analysis and its use for kinase expression profiling in Fasciola hepatica
Source: PubMed Central journal article supplement (PMC6825121; doi:10.1038/s41598-019-52416-x), 2019-11-01
Supplement: 41598_2019_52416_MOESM1_ESM.pdf [file 41598_2019_52416_MOESM1_ESM.pdf]

## Supplementary Information

Reference gene analysis and its use for kinase expression profiling in

*Fasciola hepatica*

Hicham Houhou, Oliver Puckelwaldt, Christina Strube, Simone Haerberlein

**Supplementary Table S1:** Accession numbers of reference genes and kinase genes used for the multiple alignments in Supplementary Figures S8 and S9.

| Gene          | <i>F. hepatica</i>                                        | <i>H. sapiens</i> | <i>M. musculus</i> | <i>D. melanogaster</i> | <i>C. elegans</i> | <i>S. mansoni</i> |
|---------------|-----------------------------------------------------------|-------------------|--------------------|------------------------|-------------------|-------------------|
| <i>tbcd</i>   | maker-scaffold10x_815_pilon-snap-gene-1.87                | NP_005984.3       | NP_084154.1        | NP_608648.1            | NP_492270.1       | Smp_153590        |
| <i>eprs</i>   | maker-scaffold10x_14_pilon-snap-gene-0.109                | NP_004437.2       | NP_084011.1        | NP_524471.2            | NP_492711.1       | Smp_138930        |
| <i>letm1</i>  | maker-scaffold10x_721_pilon-snap-gene-0.10                | NP_036450.1       | NP_062668.1        | NP_611922.1            | NP_506382.1       | Smp_310830.1      |
| <i>actb</i>   | augustus_masked-scaffold10x_269_pilon-processed-gene-0.18 | NP_001092.1       | NP_780706.1        | NP_001014725.1         | NP_505818.1       | Smp_183710        |
| <i>snrpa1</i> | maker-scaffold10x_234_pilon-snap-gene-0.20                | NP_003081.2       | NP_067311.4        | NP_610315.1            | NP_494763.1       | Smp_141330        |
| <i>ppp1cb</i> | maker-scaffold10x_238_pilon-snap-gene-0.95                | NP_002700.1       | NP_001357876.1     | NP_001262919.1         | NP_001022616.1    | Smp_028990        |
| <i>psmb7</i>  | maker-scaffold10x_1452_pilon-augustus-gene-0.11           | NP_002790.1       | NP_035317.1        | NP_524076.2            | NP_493271.1       | Smp_073410        |
| <i>gapdh</i>  | maker-scaffold10x_2706_pilon-snap-gene-0.15               | NP_001276674.1    | NP_032110.1        | NP_001259584.1         | NP_508534.3       | Smp_056970.2      |
| <i>abl1</i>   | maker-scaffold10x_1995_pilon-snap-gene-0.46               | NP_005148.2       | NP_001269975.1     | NP_001261964.1         | NP_509777.2       | Smp_246700.1      |
| <i>abl2</i>   | maker-scaffold10x_873_pilon-snap-gene-0.69                | NP_001129473.1    | NP_001129576.1     | NP_476849.1            | NP_493502.1       | Smp_128790.1      |
| <i>akt1</i>   | maker-scaffold10x_205_pilon-augustus-gene-0.40            | NP_001014431.1    | NP_001318036.1     | NP_001287353.1         | NP_001023646.1    | Smp_243630        |
| <i>pkc</i>    | maker-scaffold10x_608_pilon-snap-gene-0.5                 | NP_002731.4       | NP_032883.2        | NP_001036542.1         | NP_495011.1       | Smp_096310        |
| <i>plk1</i>   | maker-scaffold10x_784_pilon-snap-gene-0.36                | NP_005021.2       | NP_035251.3        | NP_001014592.1         | NP_491036.1       | Smp_009600        |

**Supplementary Table S2:** Primer sequences and product sizes in qRT-PCR

| <b>Gene</b>   | <b>Annotation</b>                                             | <b>Forward primer (5'-3')</b> | <b>Reverse primer (5'-3')</b> | <b>PCR product size (bp)</b> |
|---------------|---------------------------------------------------------------|-------------------------------|-------------------------------|------------------------------|
| <i>tbcd</i>   | Tubulin-specific chaperone D                                  | CAGCAGCCGCATTTCAGGA           | AGCCAAATGGTCAATCATCGC         | 176                          |
| <i>eprs</i>   | Glutamyl-prolyl-tRNA synthetase                               | TACACCACAACCATCGAGGC          | GTGGTCAATCCCCACGAGTT          | 167                          |
| <i>letm1</i>  | Leucine zipper and EF-hand containing transmembrane protein 1 | AGATGGATAAGTTAGCCGAGG         | ACCTTTTGGAGACGCCGTAG          | 184                          |
| <i>actb</i>   | Actin, cytoplasmic 1                                          | CATGTTTGAGACCTTCAACGCT        | AGATCACGCCCAGCAAGGT           | 189                          |
| <i>snrpa1</i> | U2 small nuclear ribonucleoprotein A'                         | GAGAACATGGGTAGTACATTGG        | CCAGATCCTCTGCTATGCG           | 148                          |
| <i>ppp1cb</i> | Protein phosphatase 1 catalytic subunit beta                  | GCAGTTGGTTACTTTGTTTTCCGG      | CAGGCCATACCGCATTGAG           | 161                          |
| <i>psmb7</i>  | Proteasome subunit beta type 7                                | TCACCAAGGATTCCACGGAG          | GATCTGGCAGATCCCGAATC          | 171                          |
| <i>gapdh</i>  | Glyceraldehyde-3-phosphate dehydrogenase                      | GCCAATGTTCGTGTTCCGGAG         | TCAACGACCTTCTGAGTGGC          | 183                          |
| <i>abl1</i>   | ABL proto-oncogene 1, non-receptor tyrosine kinase            | CTGCCTGTACATACTGTGCC          | GTGCGGTGAGTTCATGGTTC          | 154                          |
| <i>abl2</i>   | ABL proto-oncogene 2, non-receptor tyrosine kinase            | CGTTAGCGAATCCCAATCTAG         | GGTTCTCTGTGTAGTGACCG          | 179                          |
| <i>akt1</i>   | Rac-alpha serine/threonine-protein kinase                     | TCTCGGTGGTGGTCTAGT            | TATGTA CTTCGTGTCCGTAGG        | 142                          |
| <i>pkc</i>    | Protein kinase C                                              | TAAAGAGGGCATCACAGCGG          | GCCAACATTTTCCACGGAG           | 172                          |
| <i>plk1</i>   | Polo-like kinase 1                                            | ATGGCTAGTAAGGACGCTGC          | TGCTTTCGGAACCACTTTTCC         | 177                          |

**Supplementary Table S3: Expression stability of candidate reference genes based on three different life stages of *F. hepatica*: newly excysted juveniles (NEJs), immature worms, and adults.**

Ranking was based on four different algorithms: NormFinder, BestKeeper, geNorm, and comparative  $\Delta$ CT method. Candidate reference genes selected for further analyses are written in bold.

| Rank | NormFinder      |                   | BestKeeper      |                         | geNorm                |                   | $\Delta$ CT method |       |
|------|-----------------|-------------------|-----------------|-------------------------|-----------------------|-------------------|--------------------|-------|
|      | Ref. gene       | Stability value M | Ref. gene       | Coeff. of correlation r | Ref. gene             | Stability value M | Ref. gene          |       |
| 1    | <b>Fheprs</b>   | 0.118             | <i>Fhactb</i>   | 0.972                   | <b>Fhtbcd, Fheprs</b> | 0.298             | <b>Fheprs</b>      | 0.562 |
| 2    | <i>Fhpsmb7</i>  | 0.194             | <b>Fhtbcd</b>   | 0.971                   |                       |                   | <b>Fhtbcd</b>      | 0.600 |
| 3    | <b>Fhtbcd</b>   | 0.209             | <b>Fheprs</b>   | 0.970                   | <i>Fhpsmb7</i>        | 0.360             | <i>Fhpsmb7</i>     | 0.618 |
| 4    | <i>Fhsnrpa1</i> | 0.306             | <i>Fhpsmb7</i>  | 0.936                   | <i>Fhsnrpa1</i>       | 0.415             | <i>Fhsnrpa1</i>    | 0.661 |
| 5    | <i>Fhactb</i>   | 0.361             | <i>Fhgapdh</i>  | 0.922                   | <i>Fhletm1</i>        | 0.513             | <i>Fhactb</i>      | 0.800 |
| 6    | <i>Fhletm1</i>  | 0.366             | <i>Fhsnrpa1</i> | 0.810                   | <i>Fhppp1cb</i>       | 0.597             | <i>Fhletm1</i>     | 0.819 |
| 7    | <i>Fhppp1cb</i> | 0.540             | <i>Fhletm1</i>  | 0.610                   | <i>Fhactb</i>         | 0.672             | <i>Fhppp1cb</i>    | 0.966 |
| 8    | <i>Fhgapdh</i>  | 0.592             | <i>Fhppp1cb</i> | 0.305                   | <i>Fhgapdh</i>        | 0.751             | <i>Fhgapdh</i>     | 0.989 |

**Supplementary Table S4: Expression stability of candidate reference genes during *in vitro* growth of *F. hepatica* from newly excysted juveniles (NEJs) to 4 week old juvenile worms.**

Ranking was based on analysis using NormFinder, BestKeeper, geNorm and comparative  $\Delta$ CT method. Candidate reference genes selected for further analyses are written in bold.

| Rank | NormFinder      |                   | BestKeeper      |                         | geNorm                          |                   | $\Delta$ CT method |       |
|------|-----------------|-------------------|-----------------|-------------------------|---------------------------------|-------------------|--------------------|-------|
|      | Ref. gene       | Stability value M | Ref. gene       | Coeff. of correlation r | Ref. gene                       | Stability value M | Ref. gene          |       |
| 1    | <b>Fhpsmb7</b>  | 0.177             | <b>Fhpsmb7</b>  | 0.971                   | <b>Fhtbcd,</b><br><i>Fheprs</i> | 0.170             | <b>Fhtbcd</b>      | 0.564 |
| 2    | <b>Fhtbcd</b>   | 0.196             | <b>Fhtbcd</b>   | 0.945                   |                                 |                   | <b>Fhpsmb7</b>     | 0.577 |
| 3    | <i>Fheprs</i>   | 0.242             | <i>Fhsnrpa1</i> | 0.935                   | <b>Fhpsmb7</b>                  | 0.269             | <i>Fheprs</i>      | 0.600 |
| 4    | <i>Fhsnrpa1</i> | 0.263             | <i>Fheprs</i>   | 0.883                   | <i>Fhactb</i>                   | 0.317             | <i>Fhsnrpa1</i>    | 0.661 |
| 5    | <i>Fhactb</i>   | 0.340             | <i>Fhppp1cb</i> | 0.817                   | <i>Fhsnrpa1</i>                 | 0.424             | <i>Fhactb</i>      | 0.686 |
| 6    | <i>Fhletm1</i>  | 0.469             | <i>Fhactb</i>   | 0.730                   | <i>Fhgapdh</i>                  | 0.532             | <i>Fhletm1</i>     | 0.902 |
| 7    | <i>Fhppp1cb</i> | 0.596             | <i>Fhletm1</i>  | 0.670                   | <i>Fhletm1</i>                  | 0.651             | <i>Fhgapdh</i>     | 0.988 |
| 8    | <i>Fhgapdh</i>  | 0.620             | <i>Fhgapdh</i>  | 0.201                   | <i>Fhppp1cb</i>                 | 0.756             | <i>Fhppp1cb</i>    | 1.072 |

### Tubulin-specific chaperone D (FhTbcd):

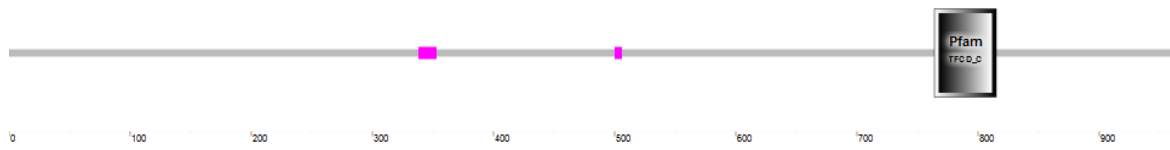

### Glutamyl-prolyl-tRNA synthetase (FhEprs):

ProRS-C\_1, Prolyl-tRNA synthetase, C-terminal

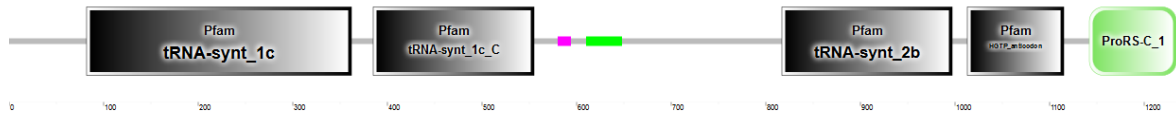

### Actin, cytoplasmic 1 (FhActb):

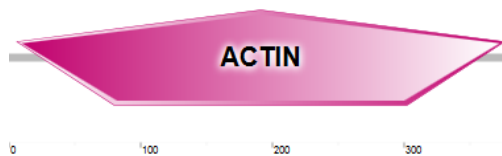

### U2 small nuclear ribonucleoprotein A (FhSnrpa1):

LRR, Leucine-rich repeat

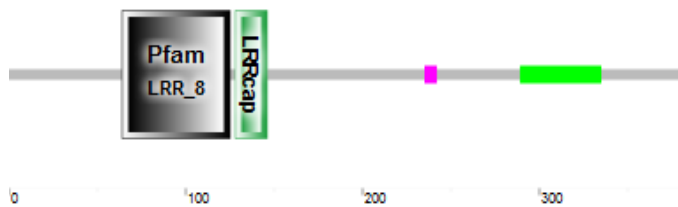

### Leucine zipper and EF-hand containing transmembrane protein 1 (FhLetm1):

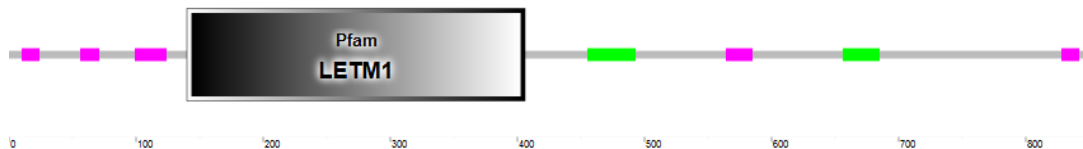

### Glyceraldehyde-3-phosphate dehydrogenase (FhGapdh):

Gp\_dh\_N, Glyceraldehyde 3-phosphate dehydrogenase, NAD binding domain

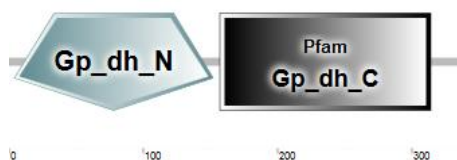

Protein phosphatase 1 catalytic subunit beta (FhPpp1cb):  
PP2Ac, Protein phosphatase 2A homologues, catalytic domain

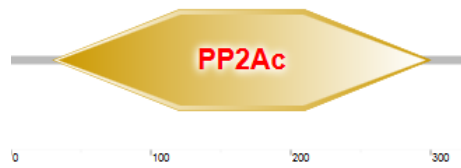

Proteasome subunit beta type 7 (FhPsmb7):

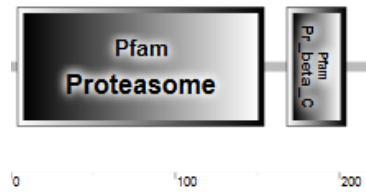

**Supplementary Figure S1: Results from SMART analysis of amino acid sequences from eight reference gene candidates of *F. hepatica*.**

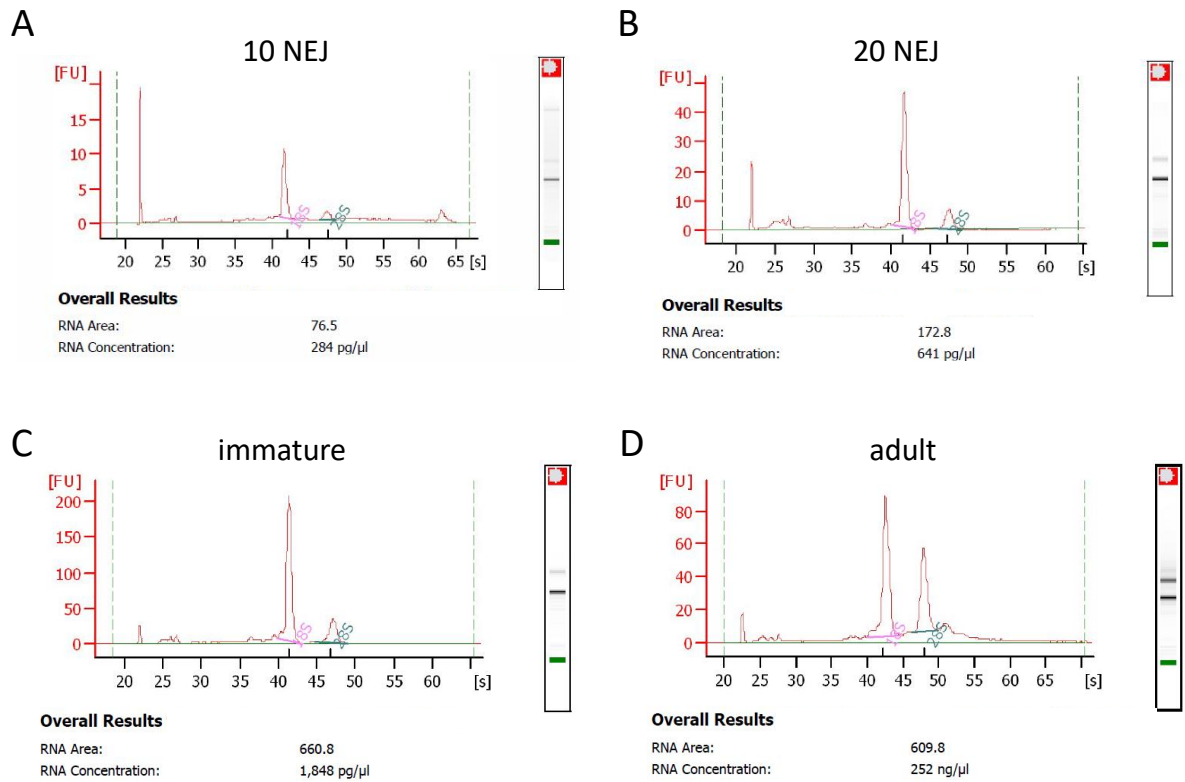

**Supplementary Figure S2: RNA quantity and quality of liver fluke samples from BioAnalyzer analysis.** Electropherograms of RNA extracted from 10 or 20 NEJs (A, B), 4-week old immature (C) or 12-week old adult flukes (D). Agilent RNA 6000 Nano Chips (adult) or Pico Chips (others) were used.



A

In vivo stages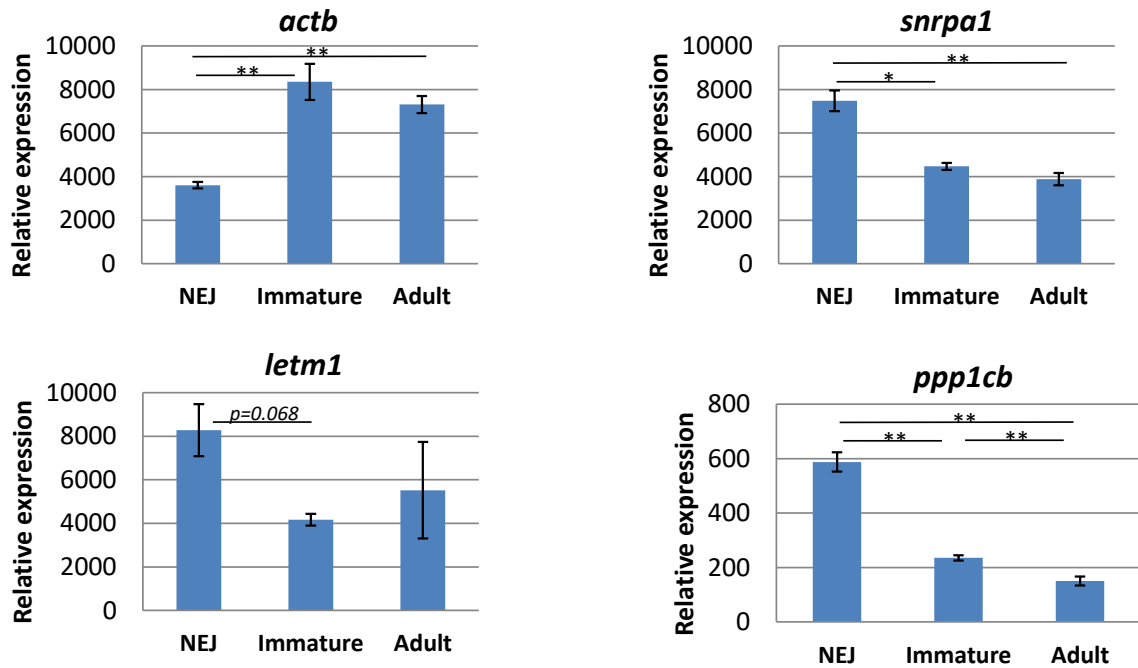

B

In vitro stages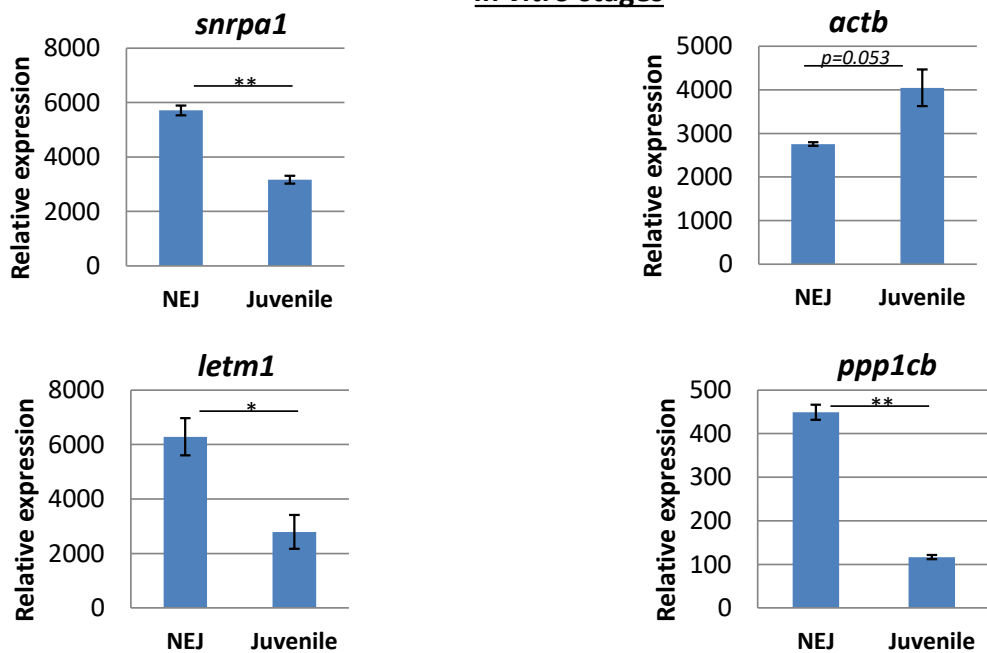

**Supplementary Figure S3: Relative expression levels of reference gene candidates in different intra-mammalian stages of *F. hepatica*.** Data were normalised against the geometric mean of the two most stably expressed genes previously identified (*tbcd* and *epsr* for A, *tbcd* and *psmb7* for B). Average values of 3-4 biological replicates with SEM are shown. Significant differences are indicated with \* p < 0.05, \*\* p < 0.01 (t-test).

### ABL proto-oncogene 1, non-receptor tyrosine kinase (FhAbl1):

SH2, Src homology 2 domain; SH3, Src homology 3 domain; TyrKc, Tyrosine kinase, catalytic domain

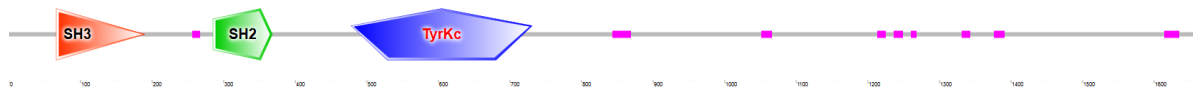

### ABL proto-oncogene 2, non-receptor tyrosine kinase (FhAbl2):

SH2, Src homology 2 domain; SH3, Src homology 3 domain; TyrKc, Tyrosine kinase, catalytic domain

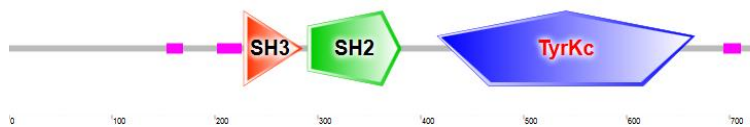

### Rac-alpha serine/threonine-protein kinase (FhAkt1):

S\_Tkc, Serine/Threonine protein kinases, catalytic domain; S\_TK\_X, Extension to Ser/Thr-type protein kinases

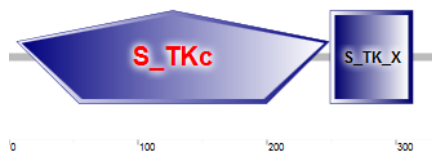

### Protein kinase C (FhPkc):

PB1, Phox and Bem1p domain; C1, Protein kinase C conserved region 1 (C1) domain; S\_Tkc, Serine/Threonine protein kinases, catalytic domain; S\_TK\_X, Extension to Ser/Thr-type protein kinases

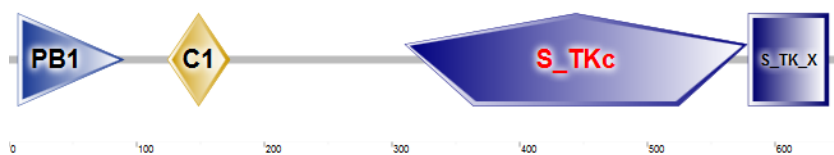

### Polo-like kinase 1 (FhPlk1):

S\_Tkc, Serine/Threonine protein kinases, catalytic domain;

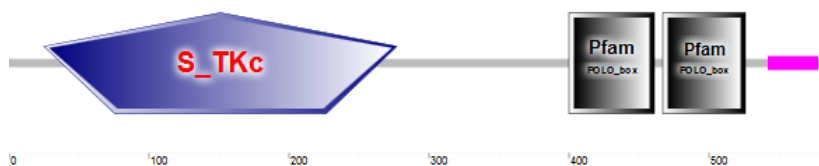

**Supplementary Figure S4: Results from SMART analysis of amino acid sequences from five kinases of *F. hepatica*.**

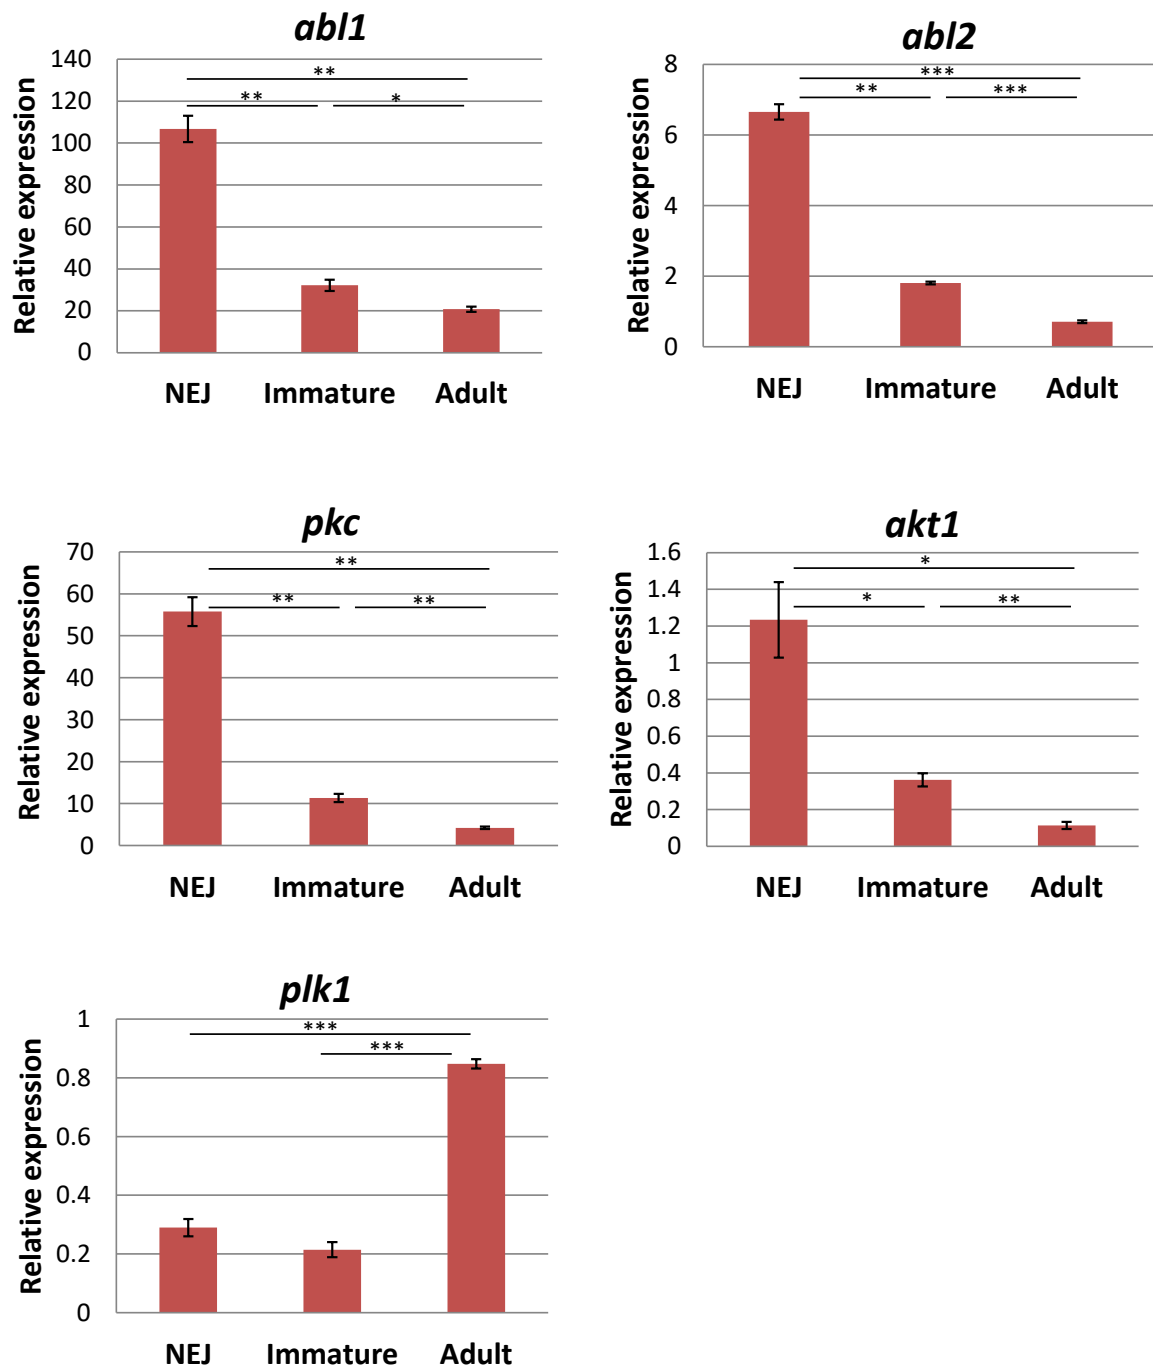

**Supplementary Figure S5: Relative expression levels of kinases in three different intra-mammalian life stages of *F. hepatica* normalised against *gapdh*.** Expression data from NEJs, 4 week-old immature, and 12 week-old adult worms were normalised against the geometric mean of the least stably expressed reference gene candidate, *gapdh*. Average values of 3-4 biological replicates with SEM are shown. Significant differences are indicated with \*  $p < 0.05$ , \*\*  $p < 0.01$ , \*\*\*  $p < 0.001$  (t-test).

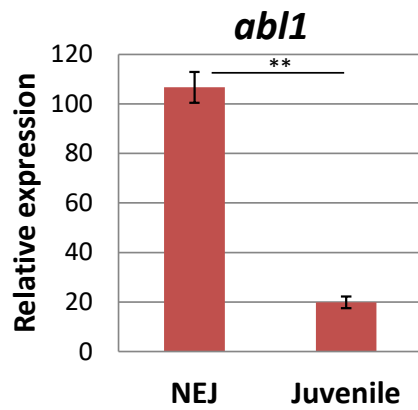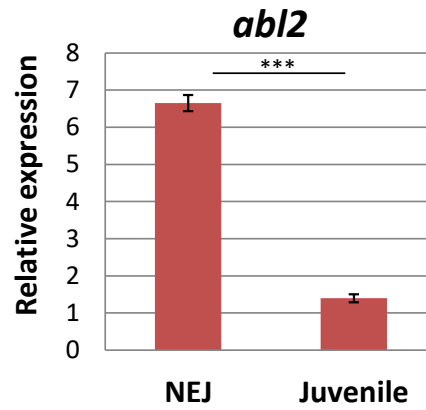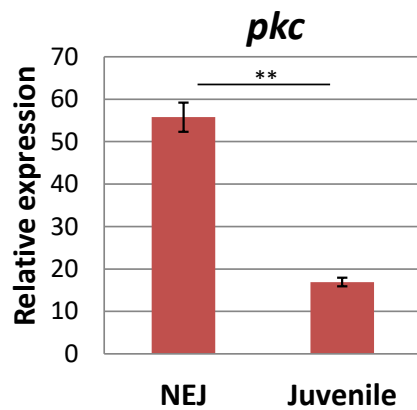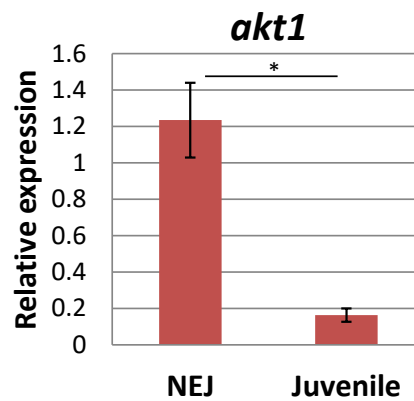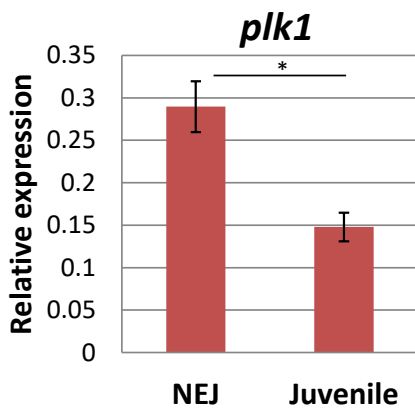

**Supplementary Figure S6: Relative expression levels of kinases during *in vitro* culture of juvenile *F. hepatica* normalised against *gapdh*.** Expression data from NEJs and juvenile worms grown for 4 weeks in serum-rich medium were normalised against the geometric mean of the least stably expressed reference gene candidate, *gapdh*. Average values of 3-4 biological replicates with SEM are shown. Significant differences are indicated with \*  $p < 0.05$ , \*\*  $p < 0.01$ , \*\*\*  $p < 0.001$  (t-test).

Abl kinase 1 (Smp\_246700):

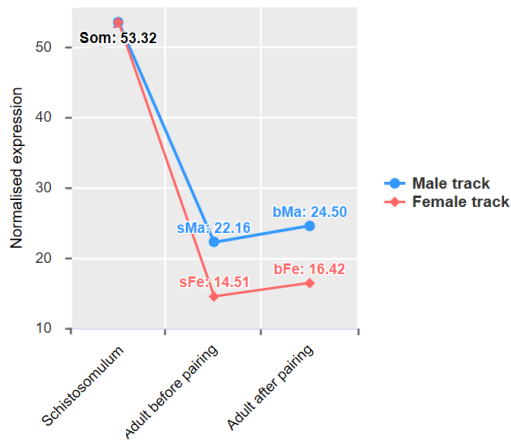

Abl kinase 2 (Smp\_128790):

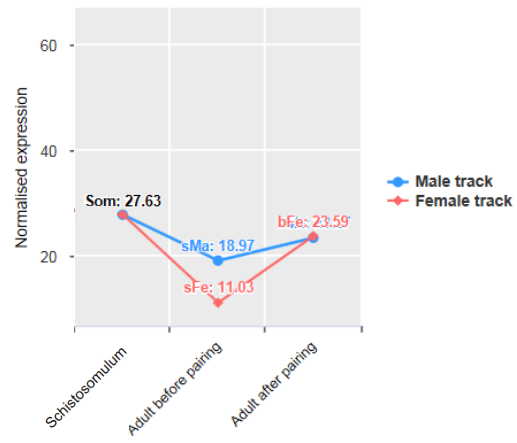

Protein kinase C (Smp\_096310):

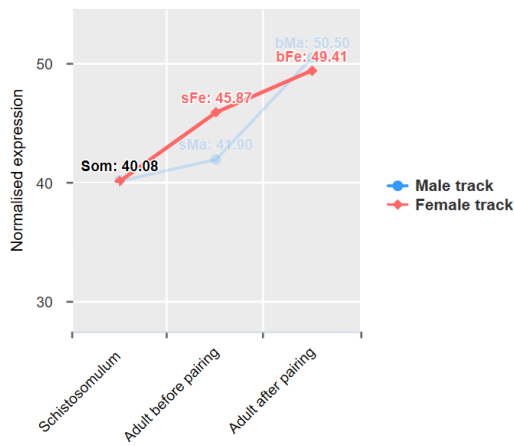

Akt1 kinase (Smp\_243630):

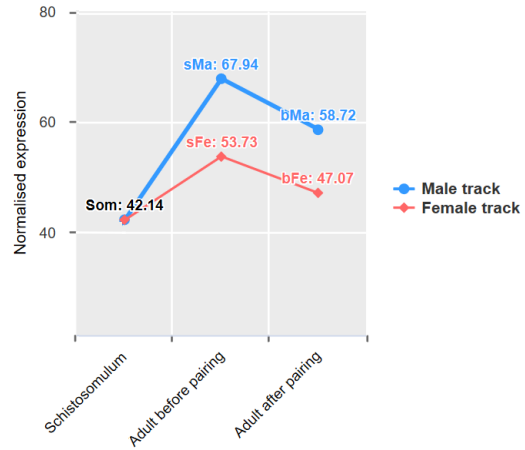

Polo-like kinase 1 (Smp\_009600):

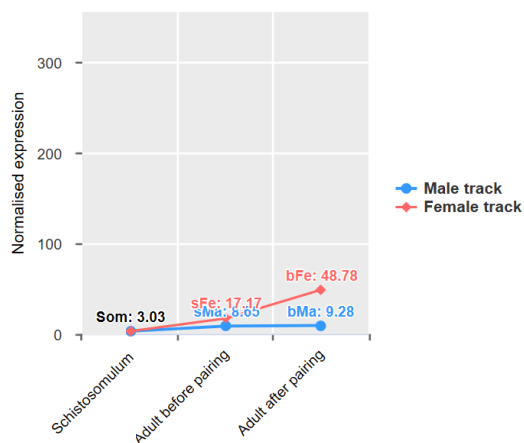

**Supplementary Figure S7: Relative expression of kinase orthologs in *Schistosoma mansoni* schistosomula and adult stages.** Data were extracted from the meta-analysis by Lu et al. 2017 available at <https://meta.schisto.xyz/>.

**Supplementary Figure S8: Multiple alignment of amino acid sequences of orthologs for reference gene candidates.** Accession numbers of gene orthologs for *C. elegans* (Ce), *F. hepatica* (Fh), *S. mansoni* (Sm), *D. melanogaster* (Dm), *H. sapiens* (Hs) and *M. musculus* (Mm) are listed in Supplementary Table S1. Conserved protein domains are highlighted. \* indicates identical amino acids.

**Tubulin-specific chaperone D (Tbcd):**

|    |                                                                |     |
|----|----------------------------------------------------------------|-----|
| Ce | MKKTKYPTLVRIISRFLFTDLVSMKIRFQRAWLRNVFADKTTTRLTRKCSSSMLHLREFLQF | 60  |
| Fh | -----                                                          | 0   |
| Sm | -----                                                          | 0   |
| Dm | -----                                                          | 0   |
| Hs | -----                                                          | 0   |
| Mm | -----                                                          | 0   |
| Ce | LGFLLLKYLSDMEDAPVDESNEGIIGCLPSAVNIHHIEEIKELVDQLPIIFKLENECDETA  | 120 |
| Fh | -----MD-SNRDLLPEEEQFLIFN---NFKHYDEVIKLISTITDATK-----LQTT       | 42  |
| Sm | -----                                                          | 0   |
| Dm | -----M-SNSVEECKDEDL-PANTLEHFTTELQQVLEMIDNIKSIAA-----NTF-       | 42  |
| Hs | --MALSDEPAA-GGPEEEAEDETLAFGAALEAFGESAEATRALLGRLRELVHG-----GGAE | 52  |
| Mm | --MVLSNEPAA-SAAEEVEEDDALVRASALEAFGESAEATRALLRSLPAVHR-----ERAS  | 52  |
| Ce | AEVNYLRYSRLLHLYQEOPRLLDKWIPEIVANLVDLVTLIGIDVSKPRAMTPLSRESLKY   | 180 |
| Fh | EEHLEEEFIKIFGFYQEOPHLLDPYLPKMISDTLEVVK-----TTKTGSRAFHFVAFRV    | 95  |
| Sm | -----                                                          | 0   |
| Dm | -EREFEQYAVLSRYQEOPHLLDPHLEELLGKLLHKIR-----KPDLDTGELHAAFKY      | 94  |
| Hs | REVALERFRVIMDKYQEOPHLLDPHLEWMMNLLLDIVQ-----DQTSPASLVHLAFKF     | 105 |
| Mm | REVAEERFRVIMDKYQEOPHLLDPHLEWMMNSLLDLVQ-----DETSLPDLVHLAFKF     | 105 |
| Ce | LSDLCIVRGSKTIVRLLPHQVHLLDPLLQTTLEYEYETSQLSHDNQRNVLLMWLWIVVKNPF | 240 |
| Fh | LYLMVKTRGYKSIIRLMPHTVDDIEPTL-----TWETRYVLLLWLSILIMVPF          | 143 |
| Sm | ---MTKTRGYKAIIRLMPHTVDDIEPTLSLLMEQDINDSKNWETRYVLILWLSILVMVPF   | 57  |
| Dm | LYIICKVRYTKVFLVKFMPHELSDFVLDLLGQQNPKEFEQWETRYILLWMSILVLNPF     | 154 |
| Hs | LYIITKVRGYKTFRLRFPHEVADVEPVLDLVTIQNPKDHEAWETRYMLLLWLSVTCLIPF   | 165 |
| Mm | LYIITKVRGYKVFLRFLPHEVANVQPVLDMFTGQNPKDHEWETRYMLLLWLSVTCLIPF    | 165 |
|    | : . * * : : : : * * : : * : * : * : * : : * * :                |     |
| Ce | DLRRFDPTG-----DPDNVITRIMNVALHYMKWDWNSSQASAAALVIAH              | 283 |
| Fh | GLNCLDSE-----DRAPIVNRILDQSKRYLSLDGRTQ-EAASFLLAR                | 184 |
| Sm | NLESLSDF-----GKKPIIERVIDLAKLYLLQDERTQ-EAAAFLLAH                | 98  |
| Dm | HMSRLDAYDTSTSPATTNCSPVNHVQSKNTKMDRIFELIQLYVSSNDTCS-SMAAFLLAAK  | 213 |
| Hs | DFSRLDGNLLTQP-----GQARMSIMDRILQIAESYLIVSDKAR-DAAAVLVSR         | 213 |
| Mm | DFSRLDGNLSTQT-----GETRVPTMDRILQIAESYLVVSDKAR-DAAAVLVSK         | 213 |
|    | : : * : * : : : * : * : * : * : : * : : :                      |     |
| Ce | CLSRTDGIPKV-LSFSLRLLDSIKT---HHENKLLLADLILLAILKHVDRRVLGTGHI     | 338 |
| Fh | LVTRPDVVQAHLTPVLDWCLEQIKNADCTTGKGQKLLCGVLRSLANICKVGRRQELLAHA   | 244 |
| Sm | TVTRPDALHAQLPSIISSAIKNLSFADVINVQDQKQVCGTLRSIANICKLGSRTPELLPYA  | 158 |
| Dm | YFIRSDIKDLYLERFLDWIMEQHQAADTLN-----VKFGQLAAVAAAILKHGKREDLLPYA  | 267 |
| Hs | FITRDPVKQSKMAEFLDWSLCNLARSSFQTMQGVITMDGTLQALAQIFKHGKREDCLPYA   | 273 |
| Mm | FITRDPVKQRKMASFLDWSLCTLAHSSFQTIIEGVITMDGMLQALAQIFKHGKREDCLPYA  | 273 |
|    | . * * : : : : : * : * * * * : :                                |     |
| Ce | GTIHEQLSFLYPIDEKKGGLICKLVKVVQRIIGLIALKPRTCSSWSYNRGKRLLEGMLDDN  | 398 |
| Fh | PRLLES-ILHMSIAAAKGNWIYRFETKLLQRIGLLFCPPRSFSWQYQRGLRSLADNLAPR   | 303 |
| Sm | SDLLSA-VLQLPGDSSKGILLCRLETQVLRIGLLFCPPINTTWQYQRGSRSLQENLES     | 217 |
| Dm | DKLLQW-ITSCQYKDDNDFLKYKNYVKIIQRIIGLVHLKPRIASWRYKRGTRSLATNLNQT  | 326 |
| Hs | ATVLRCLDGCRLPESNQTLRKLGVKLVQRLGLTFLKPKVAAWRYQRGCRSLAANLQLL     | 332 |
| Mm | NTVLQCLDGCRLPESSTSLRKLGVKLVQRLGLTFLKPKVATWRYQRGCRSLAANLKLK     | 332 |
|    | : : : : * : * : * : * * * * * :                                |     |

Ce EEYSDEPSFSNKNVNS----NQS----CNNEIDKENQWNDGDELENSEIVEFALMHVLEAL 450  
Fh LRELQNTTDTGNTNQA-SNFSTSLERTVTHGLTESTDDDDDELDEHAEVAEVIDRLINSL 362  
Sm LMNHDKNSSVSAKVTDHSSYTSFQNNISSDISGDCSLTMKHEFPNTDEVAEVIDKLSAL 277  
Dm TAAGGEPV-----V-----LEQSL--EEGEEIVVPDAIEEVIEELLQAL 363  
Hs TQQQSEQK-----P----L--ILTEDDEDDDDVPEGVERVIEQLLVGL 369  
Mm APGKSDQK-----L----LSDSLTSDGDEDYDVPEGVETVIEQLLVGL 371  
. : : : : : : : : : \*

Ce SHSDTAVRWSAAKGVGRITVRLPNFDLATQVVGSI ISSHFGEVAEYSSWHSHGACLALAE 510  
Fh RNQYTVVRWSAAKGLGRMCGRLSR-SMVNDVLSAILL-LCTRLEPFTAW--HGACLALAE 418  
Sm RSQFTGVRWSAAKIGRICSRLSS-SMVNDVLSAVLS-LCTKLEPYTAW--HGACLALAE 333  
Dm RSGGNDIRWSAAKGLGRVTNRLPK-ELADEVIGSVID-ILNPLEPHEAW--HGACLALAE 419  
Hs KDKDTVVRWSAAKIGRMAGRLPR-ALADDVVGSVLD-CFSFQETDKAW--HGGCLALAE 425  
Mm KDKDTVVRWSAAKIGRMAGRLPR-ELADDVVGSVLD-CFSFQETDKAW--HGGCLALAE 427  
. :\*\*\*\*\*:\*\*\*: \*\* :. :\*:::: :\* \*\*.\*\*\*\*\*\*

Ce LAHRGVLLPSLLEDIVPALELSLVFEDVMGRHQNGNQVRDAACYAVWALSRTYEPSMMAP 570  
Fh LGRRSLLLPSKLEVPVILRALFYDERSGDHSGNSVNRDAACYVCWAFARAYQAADLAP 478  
Sm LGRNLLLPSKLEPEVIPVLLRALFYDERSGDHNYGSNVRDAGCYVCWAFARAYHPKDFLD 393  
Dm LAKRGLLLPHRLEELVPLLMQALFYDEMKGYSVGVQHIRDSACYMCWAFARAYNPDDVKP 479  
Hs LGRRGLLLPSRLVDVVAVILKALTYDEKRGACSVGTNVRDAACYVCWAFARAYEPQELKP 485  
Mm LGRRGLLLPSRLSEVVTVILKALTYDEKRGACSVGANVRDAACYVCWAFARAYEPQELTP 487  
\*.:\*.:\*\*\* \* ::: : :\* ::: \* . \* :\*:\*.\*\* \*\*:\*:\*. .

Ce YLQRLASALLCGALFDRQVNLRRRAASAALQEMVGRQKNVSHGIPLIQSVDYFAVTNRQKC 630  
Fh YVTQVAQSLVLVSLFDREVNRRRAAAAFQENVGRQGQFPHGIEILTACDYFAVRNLKNC 538  
Sm YIVPIASSLVLVSLFDREVSRRRAASAFAQENVGR--QFPHGIEILTTCDYFTVGNRAHC 451  
Dm FVHKISSGLLTVAVFDREVNCRRAASAFAQESVGRGNGFPFGIEISTTTDFYVSVGIRONS 539  
Hs FVTAISSALVIAAVFDRDINCRRAASAFAQENVGRQGTFFPHGIDILTTADYFAVGNRSNC 545  
Mm FVTAISSALVIAAVFDRNVNCRRAASAFAQENVGRQGTFFPHGIDILTTADYFAVGNISNC 547  
:: :...\*: :\*\*\*\*\*:. \*\*\*\*\*:\*\* \*\* \* . \*\* : : \*:::\* :.

Ce YEHLCPVAEYSTYSAILRHLITKKVHVHWEKIREQAAISLEKISEIRLENVSDDYME 690  
Fh YLELSAFVAQFPEYTQAMIDHLATKLLGHWDVIRFLSARALNVLCRFSPE----- 589  
Sm YLQLSIFVAKFKEYAKPMIDHLVNVRLGHWDSDSIRYLAACALGKLYIADPDYMEIVLPQ 511  
Dm YLNISDYIAQFEVYREPLINHLVQHKVSHWDSAIRELTAALHKLKSLWEPEYMAAVVLPQ 599  
Hs FLVISVFIAGFPEYTQPMIDHLVTMKISHWDGVIRELAARALHNLAAQQAPEFSATQVFP 605  
Mm FLIISVFIAGFQEYTKPMIDHLVSMKINHWDGAIRELSAKALHNLTPQVPEYIAMHVFP 607  
: . :\* : \* : : \*\* : \*\*\* \*\* :\* :\* : :

Ce ILDDFLKASCETRISPFLRHGYLLASGHLIKGLTSRGMDF-----SSKQTEIAWIPHIL 744  
Fh -----DAIGPELLVQIKEIV 604  
Sm IINGS-----INSTLHNQOGCIYGTGELVCSS-----SSCVINEENLLKIKEIV 555  
Dm LLAKT-----DTIDINCRHGCVLAMGEITLTLRKLKLEEKSD-PQVVYLSNQRVAELNELI 652  
Hs LLSMT-----LSPDLHMRHGSILACAEEVAYALYKLAAQENRPVTDHLDEQAVQGLKQIH 659  
Mm LLLMT-----QSPDLHTRHGAILACAEEVYALYKLATQSNRLVTDYLDKAVQSLKQIH 661  
: : : :

Ce WPFCD---MTTQPGALIRRTLCKFIQLVSASKKVLLEKDKSEWLDVLLQLIT----- 794  
Fh PTLSERNQFRGLSGELLRKASCHLIEKSSRTRLPLHGDPVIETWRLLLDDCVA----- 657  
Sm PALKSANKFRGLSGELIRKATAHFIQKCAMAKLPFHDDPIIEVWREFLDDCVG----- 608  
Dm ITFLDKNFYRGMGDLMSCTSSYIKNCSLAKLQATPE-CLVSWQKVIDSCLI----- 704  
Hs QQLYDRQLYRGLGGQLMRQAVCVLIEKLSLSKMPFRGDTVIDGWQWLINDTLRHLHLISS 719  
Mm QQLCDRHLYRGLGGLMRQAVCILIEKLSLSRMPFKGDATVEGWQWLINDTLRSLHLVSS 721  
: . \* \*:: . \* : : : : \* . : . :

Ce DPREIIRSLAKTAVGEFVMTYLMNDEELIQKV-K----TRVIAAMTKCSDESERIGMGM 849  
Fh HKEVEIQKTAVSAYTQLLAAYLYDKDKHLQIAYRDKMFGHLTQQLE-ANSETKQSGFLQV 716  
Sm HKNPEVQKATVNAYPHFLSAYLYDRNGELQLGYKDLLYRNFLLQLN-TNSESKLSGYLQI 667  
Dm TKSNAIRDGAVEAFGELCTTYCYSDSRHGE--NEAIINTYLTGADNDLEEHIRMGYIAA 761  
Hs HSRQQMKDAAVSALAALCSEYYMKEPGEADPAIQEELITQYLAEL-RNPEEMTRCGFSLA 778  
Mm HSRQQIKEVAVSALTALCSEYYVKEPGEAGSSIAKELIPQYLAEL-QSPEEMARCGFSSA 780  
          :. . : \* : \* . . \* \*

Ce CESLNSEAVDY---EMFESLCNTILTP-----TSSDAKWALARQQTVFALNR 893  
Fh LADAPADLFTGHVQKTLELVTAACRISTK-----TRSWG DARASALKSVLG 762  
Sm IGAAPNSLYCGHVADLLDTVTSACRSTSK-----TKFWVDSRGSALKALVE 713  
Dm LGVLP S FMIRCHLQAILDSL VKHSLTPLQAVLVGEMGDRENIQAYRWSEARTQSVLALTK 821  
Hs LGALPGFLLKGRLLQOVLTGLRAVTHTSPE-----DVSFAESRRDGLKAIAR 824  
Mm LGALPGFLLRGHLQOVLSGLRRVTCISPN-----DVSFAEARRDGLKAIAR 826  
          : : : : \* . : :

Ce ISVNSSTET-----FNIRIGQKCFETLYKAMTDYTT SANGDIGRFVREASMRAMSTIL 945  
Fh ----- 762  
Sm I IKNLGAHHSE-----LNATILKSTCYILLQSLSDYTMDSRGDVGSLVREVMKCLDSYI 768  
Dm LVKTVGYG--GGIDSFAEPKFNFKVIECLLRALQEYTLDNRGDIGAWVREAA MSSLYEIV 879  
Hs ICQTVGVKA-GAPDEAVCGENVSQIYCALLGCMDDYTTDSRGDVGTVWRKAAMTSLMDLT 883  
Mm ICQTVGVNTRGPPDEVICKENISEVYAALLGCMSDYTTDSRGDVGAWVREAA M TSLMDLM 886

**TFCD\_C**

Ce --VDAKTEPPFLDEHVIKS-**AKYMVQOSAERISRTREACACACLKSLVKC-EITGRCLPHI** 1001  
Fh -----VEEIVVSI VQOSVEKIDRTRAAAGQAFSGILYH-EPPIRYIPHV 805  
Sm EFLVNNQYSELITSDMIEEVMTSIAQQAVEKIDRTRGVAGQVFAHLLHH-DPPIEIHSHF 827  
Dm ----TTCPPDLLAPEQVHEIVVGFMQQAVEKIDRTRGLGGRLCCQLIHH-QPRIPYIREH 934  
Hs L-LLARSQPELIEAHTCERIMCCVAQQASEKIDRFRAHAASVFLTLLHFDSPPIPHVPHR 942  
Mm L-LLARTEPVLIEAHICERVMCCVAQQASEKIDRFRAHAARVFLTLLHFDSPPIPHVPHR 945  
          . . \*\* : \* : \* \* . : : . : .

**TFCD\_C**

Ce **DLLMNIYSE**----**PMDFISDRTVFQLKPLLDLGSEYYEQLILGIVVSAGGLAEGTQKTAK** 1057  
Fh **KKVKEIFS**----- 813  
Sm **EELKQIFPKSDCDDMIWNSANSTFHRFTKLLDFPEYRYRLILGLIVSVGGLTELTIRCST** 887  
Dm **SKLLEIFPA-DADSVLWLFADHTFPLFCCELLSLPDYSKRVLGLGLSASIGQLTESLIKYAS** 993  
Hs **GELEKLFPRSDVASVNWSAPSQAFPRITQLLGLPTYRYHVLLGLVVSGLGTESTIRHST** 1002  
Mm **QELESFPRSDVATVNWNAPSQAFPLITQLLGLPTYRYHVLLGLAVSVGGLTESTVVRHST** 1005  
          : . . .

**TFCD\_C**

Ce **QLLLDHQREICENKPRFDHFLSTCADLFQARARKVNRIGNSFMQILPQIFGNLGIYEQCPE** 1117  
Fh -----**NVIVPLFRFVDFLLNDPVIAGAVN**- 837  
Sm **SALSAYFLDHESDQLFIVEVLKIVGQILQSFQRQEEIRIVVPLFKFLDFLLNDPIVNSTID**- 946  
Dm **SALFHFLRS---NPETVPRLCSEVVQIFEEHLLNERVYTPLLSFLDILIGSGTVESVLHD** 1050  
Hs **QSLFEYMKGIQSDPQALGSFSGTLLQIFEDNLLNERVSVPLLKTLDHVLTHGCFDIFTE** 1062  
Mm **QSLFEYMKGIQKDAQVLQSFSETLLKVFEDNLLNDRVSVSLLKMLDQLLANGCFDIFTAE** 1065  
          . : : : : .

**TFCD\_C**

Ce **TSESI-EMVDTMKTI AVRSSMMSR**QRLSIDSLGELLNCGKKSTVYRSALTMILD T LNSQ 1176  
Fh -----GESFGMLQFEG--SARKRSASLMMILMAHK 866  
Sm **PNSSILLQLTESVWNETKLT KD VQR**IKAAIDVFGMLQFTG--SVRKRSLSLMMIILGSR 1004  
Dm **EANPFAEDIFRLLNLEVKGYKKLYKTATSISAFQCQLLQVPR--L-SKRILSKLSVFLGLQ** 1107  
Hs **EDHPFAVKLLALCKKEIKNSKDIQK**LLSGIAVFCMVQFPG--DVRRQALLQLC LLLCHR 1120  
Mm **ENHPFCVKKLLTLCKEEIKNSKDIQK**LRSSIAVLCGMVQFNG--DVRKKILLQLFLLLGH 1123  
          : : : : : :

Ce QPVLKRSAAERLYEHL C-----CAEESDDEVLEVLATTNWQDENDNVLKQAVA----- 1224  
Fh YPVIRKSAATKLYECLVMFDL---VEPEVMDQVTTLLTETIWESELDEIRPIRNTIC EML 923  
Sm YPIIRKATATELYEGLLVYEL---CPSELLDQVSSILTETIWEGDIEAVRPIRNQLCELF 1061  
Dm HVHVRKTAATKLYEALALHGDVTEVPEENMDEILTLLSETDWTQPLVEVRPLRNQLCQLM 1167  
Hs FPLIRKTTASQVYETLLTYSDV--VGADVLDEVVTVLSDTAWDAELAVVREQRNRLCDLL 1178  
Mm FPVIRKSTASQVYEMVLTYS DL--VDAEVLDEVMSVLSDTAWDAELPVVREQRNRLCDLL 1181  
          : \* : \* : \* : : : : \* \* : :



Ce GISEKLIF----- 1232  
 Fh GVPVPRIINPKVTPDSNTPTDQTRSVISVNGDAGDRG 960  
 Sm QVPVPRATSKTQNHTSPA----- 1079  
 Dm DIKPPVSGAAAAAALQQASADK----- 1189  
 Hs GVPRPQLVPQPGAC----- 1192  
 Mm GVPRPQLVPKPIPGS----- 1196  
 :

**Glutamyl-prolyl-tRNA synthetase (Eprs):**

Ce MMITRELVLKANREQPPYASILALAASGFSLEKSVQFSEKQQLALNLDG-EL--LSNDVE 57  
 Fh -----MMESAIEWIYNN-LKKNSVDI----- 20  
 Sm -----MCVCLEAFKES-LKYHLPGL----- 19  
 Dm ---MSIKLKANLNNPPIISGLATAHLINGTVPVEIVWSKEE-TSLQFPDNRLLVCHSNND 55  
 Hs ---MATLSLTVNSGDPPLGALLAVEHVKDDVSI SVEEGKEN--ILHV--SENVIFTDVNS 53  
 Mm ---MAALCLTVNAGNPPLLEALLAVEHVKGDVSI SVEEGKEN--LLRV--SETVAFTDVNS 53  
 : : : .

Ce IARI IAQSTDAADSLGSSIIDFAVVDLNTNFIAAVTKND-YS-----LLL GKDFPTKI 111  
 Fh -----PS-EVLLSII PKTNGTPSIHVLNWNVRFV PAYLMNSKKR SWAMEQLEKSLAHATFL 74  
 Sm -----NE-DSLKLALKGIAGEDDLQTYNWNVRFATTYLPQCDFVWAGKEIDKALVNSTYI 73  
 Dm VLRALAR-AAPDYKLYGETAIERTQIDHWLSFSLTCE---DDISWALSFLDKSIAPVTYL 111  
 Hs ILRYLAR-VATTAGLYGSNLMEHTEIDHWLEFSATKLSSCDSFTSTINELNHCLSLR TYL 112  
 Mm ILRYLAR-IATTSGLYGTNLMEHTEIDHWLEFSATKLSSCDRLTSAINELNHCLSLR TYL 112  
 : . \* : \* :

Ce LDNSLTVADFAIFSVAHNNPQLKAKFSGI-----I-----DKVLKEPTLAAAHNF 156  
 Fh VG----- 76  
 Sm NGSEFSLSDLAIWTFLEINPDWHKLNESYKTDG SVKSFVNLKQYYDRLITLPSVRKL--K 131  
 Dm VANKLTIADFALFNEMHSRY---EFLAAKGIP-----QHVQRWYDLITAQPLIQKV--L 160  
 Hs VGNSLSLADLCVWATLKGNAAWQEQLKQKAP-----VHVKRWF GFLEAQQAFQSV--G 164  
 Mm VGNSLTLADLCVWATLKGSAAWQEHLKQNKTL-----VHVKRWF GFLEAQQAFRSV--G 164

Ce VGLYKS-----AAAPTATASTGKEKKKDEGKFVELPGA EKGVVVRFPPEAS 203  
 Fh ----- 76  
 Sm TEIYESRLQPRGVSVNSEPPSNTIGKTHASDMLFEKGGKFGELPGARVGEVVRFPPEAS 191  
 Dm QSLPEDAKVKR-----S-PQSSKEQTPAKTGERKQEGKFVDLPGAEMGKVVRFPPEAS 213  
 Hs TKWDVS-----TTKARVAPEKKQDVGKFVELPGAEMGKVTVRFPPEAS 207  
 Mm TKWDVS-----GNRATVAPDKKQDVGKFVELPGAEMGKVTVRFPPEAS 207

**tRNA-synt\_1c**

Ce GYLHIGHAKAALLNQYYQQAFEGQLIMRFDDTNP AKENAHFEHV I KEDLSMLNIVPDRWT 263  
 Fh -----DDFSVADLADTFKGRLLILRFDDTNP SKEKANFEESILCDLPRIGVKWDVRS 127  
 Sm GYLHIGHAKAALLNQHYRDI FKGRLILRFDDTNP DKEKECFEKSILSDLPRIGVTWDAIS 251  
 Dm GYLHIGHAKAALLNQYYALAFQGTLMRFDDTNP AKETVEFENVILGDLEQLQIKPDVFT 273  
 Hs GYLHIGHAKAALLNQHYQVNFKGKLMRFDDTNP EKEKEDFEKVI LEDVAMLHIKPDQFT 267  
 Mm GYLHIGHAKAALLNQHYQVNFKGKLMRFDDTNP EKEKEDFEKVI LEDVAMLHIKPDQFT 267  
 : \*:\* \*\*:\* \*\*\*\*\* \*\* . \*\* . \* \* : : : \* :

**tRNA-synt\_1c**

Ce HSSDHFEMLLTMCEKLLKEGKAFVDDTDTETMR NEREQRQDSRNRSNTPEKNLQLWEEMK 323  
 Fh HTSDHFDLLINLCEQMLREGKAYVDNTDTETMR TERENRKP SACRENTQONLAWWEEMK 187  
 Sm STSDHFDEMLKLC EQLIKEGKAYVDNTDTET IRVQREARQMSACRDNSIEQNL SWWGEMK 311  
 Dm HTSNYFDLMLDYCVRLIKESKAYVDDTPPEQMKLEREQRVE SANRSNSVEKNLSLWEEMV 333  
 Hs YTSDFH FETIMKYAEKLIQEGKAYVDDTPAEQMKAEEREQRIDSKHRKNPIEKNLQMWEEEMK 327  
 Mm YTSDFH FETIMKYAEKLIQEGKAYVDDTPAEQMKAEEREQRTE SKHRKNSVEKNLQMWEEEMK 327  
 :\*:\*:\* : : . : : :\* .\*\*:\*:\* \* \* : : :\*\* \* \* \* . \* : : \*\* \* \*\*

**tRNA-synt\_1c**



Ce PSAPAPTTPS-SSESNSALNIYNLIEAQGLLVRELKKGDAKSQATKDAIAKLLELKKQYK 843  
 Fh -----AKQPKAEMTEEEAAK-----ALERQ-----RKK 628  
 Sm -----KTVKIENLTPEEAAK-----AAEQQ-----RRK 749  
 Dm SASSAPVPAASSSSANDAVSVNASIVKQGDVRLDLKGGKASKPEIDAAVKTLLLELKAQYK 859  
 Hs ---PTPSLNNNCTTSEDSLVLNRYVAVQGDVVRELKAKKAPKEDVDAAVKQLLSLKAQYK 792  
 Mm ---PAPAVSSTCATAEDSSVLYSRVAVQGDVVRELKAKKAPKEDIDAAVKQLLTLKAQYK 792

: . : . \*

Ce EVSGSDHKPGVPPAASVASAPAPAPAAGSTNALDIYHQIESQGALVRELKKGDAKSQATK 903  
 Fh EEKKEARKEGRAKAKQAK----- 646  
 Sm EEKKEARKEGKLLKAKQQQ----- 767  
 Dm TLTGQDWKPGTVPTTAAPSASAAAPSVGVNDSVAQILSQITAQGDVRELKSAKADKATVD 919  
 Hs EKTGQEYKPGNPPAEIGQNISSNSSASILE-SKSLYDEVAAQGEVVRKLKAEKSPKAKIN 851  
 Mm EKTGQEYKPGNPSAAAVQTVSTKSSSNTVE-STSLYNKVAAQGEVVRKLKAEKAPKAKVT 851

. . \* \* :

Ce DAIKLLLALKKQYKEVTGSDHKPGVVPVSAPA-----PTPLAGGADIAGQIEA 951  
 Fh ETTECSEM-----QSTS-----MKTQPEPASS----NEQPQNK 676  
 Sm SSENKLRT-----TVVG-----HETINKPTSD----KLMYKQSN 797  
 Dm AAVKTLSSLKADYKAATGSDWKPGTTAPAPAAAPVKVQEKPNPDASVLTVNTLLNKIAQ 979  
 Hs EAVECLLSLKAQYKEKTGKEYIPGQPPLSQSSDSPT-RNSEPAGLETPEAKVLFDRVAS 910  
 Mm EAVECLLSLKAQYKEKTGKDYVPGQPASQNSHSPV-SNAQPAGAEKPEAKVLFDRVAC 910

: . . :

Ce QGVLVRLDLKNKDSKQETKDAIAKLLELKKNYKEVTGSDYKPGPAPAAAPAKVTVPAPSV 1011  
 Fh QEQ----- 679  
 Sm QSD----- 800  
 Dm QGDKIRQLKSAKSEKSLVEAEVKLLLALKTDYKSLTGQEWKPGTVAPAP---TTVNVIDL 1036  
 Hs QGEVVR----- 916  
 Mm QGEVVR----- 916

\*

Ce SGGDTL-----SKQIDDQALLVRELKMKDAKSQETKDAIAKLLQLKKQYKDATGSDYKP 1065  
 Fh -----CVKPTVEA-----VSRPP 692  
 Sm -----SVKCE-----QLK- 808  
 Dm TGGDSGSDVGSVLSKIQAQGDKIRKLSKSEKAAKNVIDPEVKTLALKEGKYKTLGSKDWTP 1096  
 Hs -----KLKTEKAPKDQVDIAVQELLQLKAQYKSLIGVEYK 952  
 Mm -----KLKAEKASKDQVDSAVQELLQLKAQYKSLTGIEYK 952

. .

Ce APAQLAASAAA--APAPAPAFDEAALLKEIEEQGAVVRDAKSKDPKSQDSADAINKLLAL 1123  
 Fh IVA-----ESCSAKSI-----K----- 704  
 Sm -----PVSPKVI-----V----- 816  
 Dm DAKSEPAVVKKEASPVSMASPAKDELTOEINAQGEKVRAAKGNKAAKEVIDAEVAKLLAL 1156  
 Hs VSATGAEDKDKKK-----KEKENKSE-----KQNKPKQK----- 981  
 Mm VSATGAEDKDKKK-----KEKENKSE-----KQNKPKQK----- 981

Ce KANFKKATGKDFPAPSNAQSKKGKKK----- 1149  
 Fh -----IPKSDQVELSKKEGAKKQTRLA 726  
 Sm -----KNEKQKESLLKMSGTKKQSKLA 838  
 Dm KAKYKEVTGTDVFPVAGRGGGGGGGSAKKAPKEAQPAPKPKVKEPAADASGAVKKQTRLG 1216  
 Hs ----NDGQRKD-PSKNQGGGLSS-----SGAGEGQGPCKQTRLG 1015  
 Mm ----NDGQKGD-SSKSQGSGLSS-----GGAGEGQGPCKQTRLG 1015

Ce ----- 1149  
 Fh LEATKESEFSEWYSQLITKAELLEYYDISGCYIIRPWAYSLWQTIQRFLDERLHAMGVEN 786  
 Sm IEASKETDFSDWYSELIIKSELLDYDYDISGCYILRPWAYHMWQSIQCFMDEKLVKMGIEIEN 898  
 Dm LEATKEDNLPDWYSQVITKGEMIEYYDVSGCYILRQWSFAIWKAIKTWFDAEITRMGVKE 1276

Hs LEAKKEENLADWYSQVITKSEMIEYHDISGCYILRPWAYAIWEAIKDFDFAEIKKLGVEN 1075  
Mm LEAKKEENLAEWYSQVITKSEMIEYYDVSGCYILRPWSYSIWESIKDFDFAEIKKLGVEN 1075

**tRNA-synt\_2b**

Ce ----- 1149  
Fh AYFPMFVSKGALEREKKNHVSDFAPEVAWVTKSGDSDLAEPVAVRPTSETIMYPFAFAKWIQ 846  
Sm AYFPMFVSKSALEREKKNHVTDFAPEVAWVTKSGDTDLAEPPIAIRPTSETIMYPPIFAKWIQ 958  
Dm CYFPPIFVSKAVLEKEKTHIADFAPEVAWVTKSGDSDLAEPPIAVRPTSETVMYPAYAKWVQ 1336  
Hs CYFPMFVVSQSALEKEKTHVADFAPEVAWVTRSGKTELAEPPIAIRPTSETVMYPAYAKWVQ 1135  
Mm CYFPPIFVSQAALKEKKNHIEDFAPEVAWVTRSGKTELAEPPIAIRPTSETVMYPAYAKWVQ 1135

**tRNA-synt\_2b**

Ce ----- 1149  
Fh SHRDLPRLRNQWSNVVRWEFKHPQPFLRTREFLWQEGHTAYAEPDAEAEVLAILDLYAQ 906  
Sm SHRDLPRLRNQWSNVVRWEFKHPQPFLRTREFLWQEGHTAFAEKADAEAEVRLILDLYAE 1018  
Dm SYRDLPRLRNQWNNVVRWEFKQPTPFLRTREFLWQEGHTAFADKEEAAKEVLDILDLYAL 1396  
Hs SHRDLPRIKLNQWCNVVRWEFKHPQPFLRTREFLWQEGHSAFATMEEAAAEVLAQILDLYAQ 1195  
Mm SHRDLPVRLNQCNCNVVRWEFKHPQPFLRTREFLWQEGHSAFATFEEAAAEVLAQILELYAR 1195

**tRNA-synt\_2b**

Ce ----- 1149  
Fh VYQDLLAVPVIKGRKTEREKFAGADYTTTIEAYISGTGRAIQGATSHHLGQNF SRMFEVT 966  
Sm VYEYLLAVPVVKGRKTEREKFAGADYTTTVEIYIDGNGRAIQGATSHHLGQNF SRMFDVT 1078  
Dm VYTHLLAIPVVKGRKTEKEKFAGGDYTTTVEAFISASGRAIQGATSHHLGQNF SKMFEIV 1456  
Hs VYEELLAIPVVKGRKTEKEKFAGGDYTTTIEAFISASGRAIQGGTSHHLGQNF SKMFEIV 1255  
Mm VYEELLAIPVVRGRKTEKEKFAGGDYTTTIEAFISASGRAIQGATSHHLGQNF SKMCEIV 1255

**tRNA-synt\_2b**

**HGTP\_anticondon**

Ce ----- 1149  
Fh YDHPVT-GKPAFVYQNSWGLTTRTLGVLVIMVHGDSKGLVLP PPR IAPHQIVVVPCGITNKS 1025  
Sm YDHPVT-GKPAYVYQNSWGLTTRTLGVLIMVHSDDKGLVLP PPR VAPYQIVIVPCGITAKT 1137  
Dm YEDPETQ-QKKYVYQNSWGITTRTIGVMIMVHADNQGGLVLP PPR VACIQAIVVPCGITVNT 1515  
Hs FEDPKIPGEKQFAYQNSWGLTTRTIGVMTMVHGDNMGLVLP PPR VACVQVVIIPCGITNAL 1315  
Mm FEDPKTPGEKQFAYQCSWGLTTRTIGVMMVHGDNMGLVLP PPR VASVQVVVIIPCGITNAL 1315

**HGTP\_anticondon**

Ce ----- 1149  
Fh SQEDRENLLSYALLVTKTLKKDSSQFRVHCDDRTHVSPGWKFNHWEMKGV PVR LEVGPQE 1085  
Sm TVQERETLLSAAHSVFELLNKS NKQFRVHCDDRDNVSPGWKFNHWELKGVPIRLEIGPQE 1197  
Dm KDDERAQLLDACKALEKRLV--GGGVRCEGDYRDNYSPGWKFNHWELKGVPLRLEVGPKE 1573  
Hs SEEDKEALIAKCNDYRRLL--SVNIRVRADLRDNYSPGWKFNHWELKGVPIRLEVGPKE 1373  
Mm SEEDREALMAKCNEYRRLL--GANIRVRVDLRDNYSPGWKFNHWELKGV PVR LEVGPKE 1373

**HGTP\_anticondon**

Ce ----- 1149  
Fh MAKQSTCLVLRHNGIKLTVPLADICARMPQILEDIHNDLFRKATGELA AHVVQVGS LDQL 1145  
Sm VADRKVCLVLRHTGERVNVPMDSLINELPRILDDIHNAMFNKATKSLASHVMLVNDMNEL 1257  
Dm LKAQQLVAVRRDTVEKITIPLADVEKKIPALLETIHESMLNKAQEDMTSHTKKVTNWTDF 1633  
Hs MKSCQFVAVRRDTGEKLTVAENEAEKTLQAILEDIQVTLFTRASEDLKTHMVVANTMEDF 1433  
Mm MKSCQFVAVRRDTGEKLTIAEKEAEAKLEKVLLEDIQLNLFTRASEDLKTHMVVSNLTLEDF 1433

**ProRS-C\_1**

Ce ----- 1149  
Fh CSALDAKSLALAPFCGSDSCEEIIRRESARNVVVEPGAPSMGAKSLCIPFSCPFNDKLV 1205  
Sm CTALDQKSLALAPFCDDRCEEVIKESARNVIVEPGAPAMGAKSLCIPFACDFNPTLV 1317  
Dm CGFLEQKNILLAPFCGEISCEDKIKADSARGEEAEPGAPAMGAKSLCIPFDQAP 1688  
Hs QKILDSGKIVQIPFCGEIDCEDWIKKTTARDQDLEPGAPSMGAKSLCIPFKPLCE 1488  
Mm QKVLDAGKVAQIPFCGEIDCEDWIKKMTARDQDVEPGAPSMGAKSLCIPFNPLCE 1488

**ProRS-C\_1**

Ce ----- 1149  
Fh GSPATGTKCFNQPCHSRVATAYTLFGRSY 1234  
Sm GSPAPDTPCFNRQYCSRKAISYTLFGRSY 1346  
Dm --IAASDKCIN--PSCNPKPFYTLFGRSY 1714



**U2 small nuclear ribonucleoprotein A (Snrpa1):**

```

Ce      MVRLTTELF AER PQFVNSVNMREINLRGQKIPVIENMGVTRDQFDVIDLTDNDIRKLDNF 60
Fh      MVRLTAELIENAPQFTNAIQDRELDLHGKYKFAIENMGSTLDQFDTIDLSGNEIRKLDGF 60
Sm      MVRITSEIVENAPQFTNAIKDRELSLRSYKFAIENMGCTLDQFDTIDLSNEIRKLDGF 60
Hs      MVKLTAELEIEQAAQYTNVAVRDRELDLRGYKIPVIENLGATLDQFDAIDFSDNEIRKLDGF 60
Mm      MVKLTAELEIEQAAQYTNVAVRDRELDLRGYKIPVIENLGATLDQFDAIDFSDNEIRKLDGF 60
Dm      MVKLTPELINQSMQYINPCRERELDLRGYKIPQIENLGATLDQFDTIDLSNDNLRKLDNL 60
      **::* *:. : * : * . **:.*:. *:* ***:* * ****.**:.*:.***:.
      LRR_8
Ce      PTF SRLNTLYLHNNRINYIAPDIATKLPNLKTLALTNNNICELGDIEPLAECKKLEYVTF 120
Fh      PLLKRLKALILNKKIVRIAEDLGQQLPYLNTLILTSNSFTELRELDPLATCDKLTFTL 120
Sm      PMLKRLKSLILTNNKIARIAEDLGQHLPNLLTILTSNYLSDLKDLDPSSCDKLNFLSL 120
Hs      PLLRRLKTL LVNNNRICRIGEGLDQALPCLTELILTNNSLVELGDLDPASLKSITYLSI 120
Mm      PLLRRLKTL LVNNNRICRIGEGLDQALPCLTELILTNNSLVELGDLDPASLKSITYLSI 120
Dm      PHL PRLKCLLLNKKRILRISEGLEEAVPNLGSII LTGNLQELSDLEPLVGF TKLETICL 120
      * : ** : * : ** : * * . : : * * : ** . * : : * : : ** . * : :
      LRR_8      LRRcap
Ce      I GNPI TH KDNYRMYMIYKLP TVRVID FNRVRLTEREAAKMFKGKSGKKARDAIQK--- 176
Fh      THCPVTMRANYRLYVISLLPSLRFLDYKRVTNSERKLANSMFKRIPAMASSASGVKGAPG 180
Sm      LHC PVTMRANYRLYVISRVASLRFLDYRRVTVQAERKLARSMFKRLPALSNVNNLKAPYQ 180
Hs      LRNPVTNKKHYRLYVIYKVPQVRVLD FQKVKLKERQEA EKMFKGKRGQAQLAK----- 172
Mm      LRNPVTNKKHYRLYVIYKVPQVRVLD FQKVKLKERQEA EKMFKGKRGQAQLAK----- 172
Dm      LINPVST KPNYREY MAYKFPQLRLLD FRKIKQKDRQAAQEFFRTKQKGDV LK----- 172
      * : : : ** * : . : * : * : : : : * : * : : * : .
Ce      -----SVHTEDPSEIEPN----- 189
Fh      LRNGIRSQNPAGGTTTVKTFIPGAPLYTNAGVDKEN-----TA-SID 221
Sm      KANSNRIENSIPAAGVVKTFIPGAPINSNLLPPGTEPTRSSNEQIHHGEGKENNAALN 240
Hs      -D-----IARRSKTFNPGAGLPT----- 189
Mm      -D-----IARRSKTFNPGAGLPT----- 189
Dm      -E-----ISRKSKMSAAAAIAAEA-----GNG----- 193
      : .
Ce      -----ENSSGGGARLTDEDREKIKEA IKNAKSLS 218
Fh      -----ARGSTETKDISSMPPPPAAAVQMGNKRPGGSAQDLYAIQEAIKRARTMD 271
Sm      TSVETDQTESTKSDTLVSSADTPMPPSPSTPVTTGNKRPVASSQDLFAIQEAIKRARTMD 300
Hs      -----DK-KKGGPSPGDVEAIKNAIANASTLA 215
Mm      -----DK-KKGGPSAGDVEAIKNAIANASTLA 215
Dm      -----KGRGSEGGRLANPQDMQRIREAIAKRASSLA 223
      . * * : : ** . * : :
Ce      EVNYLQSI LASGKVPEK--GWNRQMDQNGADGEAMES----- 253
Fh      EVDRLHQLLSSGQFAGFAIQWQQQLRLQQQQNQQRQQQQEQEQEQQRKAEQEQETSAM 331
Sm      EVERLHQLLSSGQFAGFAAQWQKQLRQQQQQKSSQ----- 335
Hs      EVERLKGLLQSGQIPGRERRSGPT-----D-----DGEEEM 246
Mm      EVERLKGLLQSGQIPGRERRSGPS-----D-----EGEEEI 246
Dm      EVERLSQILQSGQLPDKFQHEMEAVAQNGAGH---NG-----SGAVAM 263
      ** : * : * * : .
Ce      ----- 253
Fh      DEEQTEQVQQPETMVQQNELLQHEESTNLEMATQDNIVDQQIHSMEVTQPVE 383
Sm      ----- 335
Hs      EEDTVTNGS----- 255
Mm      EDDTVTNGS----- 255
Dm      EY----- 265

```

**Leucine zipper and EF-hand containing transmembrane protein 1 (Letm1):**



Fh ASTAELPLKEAIAQLPTAASEEATARVLESALPTELDPRTKIELLRKEQANIKAAARIQRK 473  
Sm ALVDQNPLQQAIQLPPSASSEAVARVLETTPHDELDPVTKIKVLRREEQDSIKAERVQRK 252  
Ce EVSFPDRLKAIIVQNLPDGLAETTKQKLTEM-EGGQIDHKARIELIRSIESAIANEKKDEE 425  
Dm DSITTDKDKETIRVLPDAVGAHTRHAIGES-EG-KVDNKTKEIIEIKEEERKIREEREEER 511  
Hs TLSPADQLKSTLQTLPEIVAKEAQVKVAEV-EGEQVDNKAKLEATLQEEAAIQQEHREK- 483  
Mm TLSPADQLKSTLQTLPEIVAKEAQVKVAEV-EGEKVDNKAKLEATLQEEAAIQQEHLEE- 482

\*: : \*\* . : : \* ::\* :::: . : \* : ..

Fh QELAEQKKAASELDAKSAREQKLAPAAEDLVDKAPVLKGLPKEELENVKEAPSVSVVST 533  
Sm QELIEKQKSEKGTGL-----LEGDQAPLLKGLKNEELDKVTPVLTDSAAFM 299  
Ce KKKKAAEEALKSKEEAEKAKVQE-----K---EK-----LVDVAAQAI 460  
Dm EETIAKRSAIKKEEIP-----AP-----YV 530  
Hs --ELQKRSEVAKDFEPERV-VAA-----P---QRP----GTEPQPMPDPTVL 520  
Mm ---LKRASEAVKDIQPEVAEATL-----P---GRP----GPEPQPPVDDVIL 519

Fh TEEP-LALTIEGKK-SQTAVAAQATPTESTSSKELQLKE-ALKKVLAAKVTKEEEPEITV 590  
Sm SENTEIQPEIRKQHVQNIPPIHAVQTAFDGGKSKDDSHIDSLSMKPEKPKTSDTEEVTEISA 359  
Ce VH-----ELKKDIYDAVASTSSTTEA-----KEPAAKPSEAKEEKK-EDITVVK 503  
Dm FA-----EKLKSG-----SQDLLDH-----KEQSSVSETDKGISS-TDVQLLS 566  
Hs QS-----ETLKD-----TAPVLEG-----LKEEEITK-EEIDILS 549  
Mm PS-----EVLTD-----TAPVLEG-----LKGEETK-EEIDILS 548

Fh VDLAQIESAIAESSGALHEEAMEGLKEEVAETAT---KHTASLVSADRTVDKRTTKAAQR 647  
Sm GDLAIEHSAIAESTPHLDSETIDGLKEQVAKTAKLQQRQAELLASEEVTDKRKSKAALH 419  
Ce KDLSHIEEIVGGPIKEAKHDILGLREKVLEHKEDLMEINS-----LDGAFATKIAKR 557  
Dm EALKTLS---SDKQLVVEKETIKELKEELADYKEDVEELREVRQV--VKEPVRESRAAKL 621  
Hs DACSKLQE--QKKSILTKEKEEELLELLKEDVQDYSEDLQEIKKELSKTGEEKYVEESKASKR 607  
Mm DACSKLQE--QKKSILTKEKEEELLELLKEDVQDYSEDLQEIKKELSKTGEEKYIEESAASKR 606

: .. : \*\*:. : :

Fh LASRVGRMIGEMDTMMDKLAEEKQQLLNIELHEVHVKHSTEPTEKSEILDAIKADHERV 707  
Sm LESRVENLIKEMDTMVDKLNDKRTQLLKDIEVCESHINKSTESKERSKIMDQIKADHDM 479  
Ce LRHKLNSMIEDVDSMVDKLEDEKRNIREMLI-----DPTVENSVDLKKERE 603  
Dm LYNRVNKMISQLDNVLDLEARQHQIKQAES-----SDYAASSPTVEPQQM 667  
Hs LTKRVQQMIGQIDGLISQLEMDQQAGKLAPA-----NGMP-----TGENV 647  
Mm LSKRVQQMIGQIDGLITQLETTQQDGKLGPS-----QSTP-----TGESV 646

\* :: :\* ::\* :: .\* :

Fh VDINDLLLALRRLQKVP-----DDTR---WQKILDVLDDEDHDGKIEMQHVLSVIELLGAE 759  
Sm VDINDLLVSLKRIRNIP-----DDTR---WEKILKVLDEDRDGIKELNHLVLSVIELLGSE 531  
Ce VRIQDVIDSLAKLKEKQADDDGEQREIEREALLKTIDEDSDGIVDKQLVLEIELLEKH 663  
Dm VHIDELVATIRRMKEAS-----DEERFKVVGDLVVKLDADKDGVISVNEITKAVQSIDRE 722  
Hs ISVAELINAMQVKHIP-----ESK----LTSLAAALDENKDGKVNIDDLVKVIELVDKE 698  
Mm ISITELISAMQIKHIP-----EHK----LISLTSALDDNKDGNINIDDLVKVIDLVNKE 697

: : :::: : : : : : \* : \*\* . : : : : .

Fh -NVKLSSKEIKRVLEMVDNE----HLAEIVQSQEIIEDEARKT-AAVDNTTTE----- 805  
Sm -NVKLSSKEIARVLEMIDNE----HLAEEIPTEDLKADKNRLKSSVDHS----- 575  
Ce TDVHVSAAQMASMIGTLKK-----EDEVAGLTE---EIRKVQSGNYQMPILPTGPSSAD 714  
Dm -ATNIDKKQLEEFTELLSKLASRRRHEEIVHIDDLMNINIKVLKETSDEAR-LKHIEAVLE 780  
Hs -DVHISTSQVAEI----- 710  
Mm -DVQISTTQVAEI----- 709

..... : :

Fh -----QVQS----- 809  
Sm -----QVTS----- 579  
Ce AFNQ-PQGVYTASK-----QVPARSEQEGVEQKQVSTL--- 748  
Dm KFDADKDGVVTVNDIRKVLESIGRDNIKLSDKAIEELISLLDKEQVLQAEQKIEKAIKAS 840  
Hs -----VATLEKEEKVEEKEKAKEKA--- 730



|    |                                                               |      |
|----|---------------------------------------------------------------|------|
| Mm | -----VATLEKEEKIEEKEKAKEKA---                                  | 729  |
|    | :                                                             | .    |
| Fh | -----                                                         | 809  |
| Sm | -----                                                         | 579  |
| Ce | -----                                                         | 748  |
| Dm | MKEAEKLGKSEVVDKADKDLKLVNDIHDSAKEIQDIANEMRDKEETVDPKAKELKAEPAFK | 900  |
| Hs | EKEVAEVKS-----                                                | 739  |
| Mm | EKEAAEVKN-----                                                | 738  |
|    |                                                               |      |
| Fh | -----ESLSSPGSSTVITDATTGGISASSGAPKSSDSTISNQTRDK                | 851  |
| Sm | -----K-----                                                   | 580  |
| Ce | -----QQNSSK-----TSSSSTTKSTSD--SKSA--                          | 770  |
| Dm | DTAKTLKDNAKDLDDLAKDPKSDPKSPTKASTG--SGPAGLSGGGPSSGSSGIATGSTTE  | 958  |
| Hs | -----                                                         | 739  |
| Mm | -----                                                         | 738  |
|    |                                                               |      |
| Fh | R-----                                                        | 852  |
| Sm | -----                                                         | 580  |
| Ce | -----                                                         | 770  |
| Dm | SALREAAERQMEKILPSTDIGLPPTIQTPSQPPTSKKATATASTLSTTITAKKLL       | 1013 |
| Hs | -----                                                         | 739  |
| Mm | -----                                                         | 738  |

**Glyceraldehyde-3-phosphate dehydrogenase (Gapdh):**

|    |                                                                 |                                             |                   |                   |     |
|----|-----------------------------------------------------------------|---------------------------------------------|-------------------|-------------------|-----|
|    |                                                                 | <b>Gp_dh_N</b>                              |                   |                   |     |
| Fh | MGKARVGINGFGRIGRLVLRAAVEKGIQVDVAVNDPFIIDLDMRYMLKYDSTHGRFPYDI    |                                             | 60                |                   |     |
| Sm | MSRAKVGINGFGRIGRLVLRAAFKNKTVDVVSVNDPFIIDLEYMVMYIKRDSTHGTFPGEV   |                                             | 60                |                   |     |
| Ce | MTKPSVGINGFGRIGRLVLRAAVEKDSVNVVAVNDPFIIDYVMVYLFQYDSTHGRFKGTV    |                                             | 60                |                   |     |
| Dm | --MSKIGINGFGRIGRLVLRAAIDKGA--NVVAVNDPFIIDVNYMVYLFKFDSTHGRFKGTV  |                                             | 57                |                   |     |
| Hs | MGKVKVGVNGFGRIGRLVTRAAFNKSGKVDIVAINDPFIIDLNYMVYMFQYDSTHGKHFHGTV |                                             | 60                |                   |     |
| Mm | --MVKVGVNGFGRIGRLVTRAAICSGKVEIVAINDPFIIDLNYMVYMFQYDSTHGKFNHGTV  |                                             | 58                |                   |     |
|    | :*:***** ***. . . :*:*****.:*: *:: ***** *                      |                                             | :                 |                   |     |
|    |                                                                 | <b>Gp_dh_N</b>                              |                   |                   |     |
| Fh | TIDQNKLIVRN-----NPISVHNERDPTQIPWGASQAEYVVESTGVFTTIDKAKAHLAG     |                                             | 114               |                   |     |
| Sm | STENGKLVNG-----KLISVHCERDPANIPWDKDGAEYVVESTGVFTTIDKAQAHIKNN     |                                             | 115               |                   |     |
| Ce | AHEGDYLLVAKEGKSQHKIKVYNSRPAEIQWGASGADYVVESTGVFTTIEKANAHKLG      |                                             | 119               |                   |     |
| Dm | AAEGGFLVNG-----QKITVFSERDPANINWASAGAEYIVESTGVFTTIDKASTHLKG      |                                             | 111               |                   |     |
| Hs | KAENGKLVING-----NPITIFQERDPSKIKWGDAGAEYVVESTGVFTTMEKAGAHLQG     |                                             | 114               |                   |     |
| Mm | KAENGKLVING-----KPITIFQERDPTNIKWGEAGAEYVVESTGVFTTMEKAGAHKLG     |                                             | 112               |                   |     |
|    | : . * :                                                         | : * . . . * * : * : * * * * * : * * : * : . |                   |                   |     |
|    |                                                                 | <b>Gp_dh_N</b>                              | <b>Gp_dh_C</b>    |                   |     |
| Fh | GAKKVIISAPSADAPMFVFGVNHEKYSKD                                   | MSVVSNASCTTNC                               | LAPLAKVINDKFGIVEG | 173               |     |
| Sm | RAKKVIISAPSADAPMFVVGVNENSYEKS                                   | MSVVSNASCTTNC                               | LAPLAKVIHDKFEIVEG | 174               |     |
| Ce | GAKKVIISAPSADAPMFVVGVNHEKYDHANDHII                              | SNASCTTNC                                   | LAPLAKVINDNFGIEG  | 179               |     |
| Dm | GAKKVIISAPSADAPMFVCGVNLDAYKPD                                   | MKVVSNASCTTNC                               | LAPLAKVINDNFEIVEG | 170               |     |
| Hs | GAKRVIISAPSADAPMFVMGVNHEKYDNS                                   | LKII                                        | SNASCTTNC         | LAPLAKVIHDNFGIVEG | 173 |
| Mm | GAKRVIISAPSADAPMFVMGVNHEKYDNS                                   | LKIVSNASCTTNC                               | LAPLAKVIHDNFGIVEG | 171               |     |
|    | **:*:***** *** : *                                              | :*****:*** **                               |                   |                   |     |
|    |                                                                 | <b>Gp_dh_C</b>                              |                   |                   |     |
| Fh | LMTTVHSYATATQKVVDGPSSKAWRDGRGAGQNIIPASTGAAKAVGKVIPELNGKLTGMAF   |                                             | 233               |                   |     |
| Sm | LMTTVHSFTATQKVVDGPSSKLRWDGRGAMQNIIPASTGAAKAVGKVIPALNGKLTGMAF    |                                             | 234               |                   |     |
| Ce | LMTTVHAVTATQKTVDPGSGKLWRDGRGAGQNIIPASTGAAKAVGKVIPELNGKLTGMAF    |                                             | 239               |                   |     |
| Dm | LMTTVHATTATQKTVDPGSGKLWRDGRGAAQNIIPASTGAAKAVGKVIPALNGKLTGMAF    |                                             | 230               |                   |     |
| Hs | LMTTVHAITATQKTVDPGSGKLWRDGRGALQNIIPASTGAAKAVGKVIPELNGKLTGMAF    |                                             | 233               |                   |     |
| Mm | LMTTVHAITATQKTVDPGSGKLWRDGRGAAQNIIPASTGAAKAVGKVIPELNGKLTGMAF    |                                             | 231               |                   |     |
|    | *****:*****.*****.****** ***** ***** *****                      |                                             |                   |                   |     |
|    |                                                                 | <b>Gp_dh_C</b>                              |                   |                   |     |

|    |                                                               |     |
|----|---------------------------------------------------------------|-----|
| Fh | RVPTADVSVVDLTCRLNKAAYDEIKAAVKAADGPMKGILDYTEELLVSSDMLGTHCSS    | 293 |
| Sm | RVPTPDVSVVDLTCRLGKGASYEEIKAAVKAASGPLKGILEYTEDEVVSSDFVGSTSS    | 294 |
| Ce | RVPTPDVSVVDLTARLEKPAASLDDIKKVIKAAADGPMKGILAYTEDQVVSTDFVSDTNSS | 299 |
| Dm | RVPTPNVSVVDLTVRLGKGASYDEIKAKVQEAANGPLKGILGYTDEEVVSTDFLSDTHSS  | 290 |
| Hs | RVPTANVSVVDLTCRLEKPAKYDDIKKVVKQASEGPLKGILGYTEHQVVSSDFNSDTHSS  | 293 |
| Mm | RVPTPNVSVVDLTCRLEKPAKYDDIKKVVKQASEGPLKGILGYTEDQVVSCDFNSNSHSS  | 291 |

\*\*\*\* :\*\*\*\*\* \*\* \* \* . ::\*\* : : \* .\*\*:\* \*\* : . :\*\* \* : . \*\*

**Gp\_dh\_C**

|    |                                              |     |
|----|----------------------------------------------|-----|
| Fh | VFDAQAGISLNDNFVKLISWYDNEFGYSCRVDLINHMFVDHS   | 337 |
| Sm | IFDAKAGISLNNNFVKLVSWYDNEFGYSCRVDLITHMHKVDHA  | 338 |
| Ce | IFDAGASISLNPBFVKLVSWYDNEFGYSNRVVDLISYIATKA-- | 341 |
| Dm | VFDAKAGISLNDKFVKLISWYDNEFGYSNRVIDLIKYMOSKD-- | 332 |
| Hs | TFDAGAGIALNDHFVKLISWYDNEFGYSNRVVDLMAHMASKE-- | 335 |
| Mm | TFDAGAGIALNDNFVKLISWYDNEYGYSNRVVDLMAYMASKE-- | 333 |

\*\*\* \* .\*:\*\* :\*\*\*\*:\* \*\* :\*\* \*\* :\*\* : :

**Protein phosphatase 1 catalytic subunit beta (Ppp1cb):**

**PP2Ac**

|    |                                                                |    |
|----|----------------------------------------------------------------|----|
| Sm | --MTSEVDVDELISRLLLEVRSSRPGETVNMKEEEVRYLCVTSRQIFLSQPILLELEAPLK  | 58 |
| Hs | --MADGELNVDLITRLLLEVRGCRPGKIVQMTEAEVRGLCIKSREIFLSQPILLELEAPLK  | 59 |
| Ce | --MDVEKLNLDNIIISRLLEVRGSKPGKNVQLTESEIKGLCQKSREIFLSQPILLELEAPLK | 59 |
| Dm | --MSDIMNIDSIIISRLLEVRGARPGKNVQLSESEIRSLCLKSREIFLSQPILLELEAPLK  | 58 |
| Fh | MSDIDKLNVDSVIARLLEVRGSRPGKNVQLTEAEIRALALKSREIFLRQPILLELEAPLK   | 60 |
| Mm | MADIDKLNIDSIIQRLLLEVRGSKPGKNVQLQENEIRGLCLKSREIFLSQPILLELEAPLK  | 60 |

:::\* .\*: \* \*\*\*\*\* .:\*\*\* \* \* :\* \* . :\*\*:\* \*\* \*\*\*\*\*:\*\*\*\*

**PP2Ac**

|    |                                                              |     |
|----|--------------------------------------------------------------|-----|
| Sm | ICGDIHQYTDLLRRLFYGGFPPESNYLFLGDYVDRGKQSLETICLLLAYKIKHPENFFL  | 118 |
| Hs | ICGDIHQYTDLLRRLFYGGFPPESNYLFLGDYVDRGKQSLETICLLLAYKIKYPENFFL  | 119 |
| Ce | ICGDVHQYDYDRLRRLFYGGFPPESNYLFLGDYVDRGKQSLETICLLLAYKIKYPENFFL | 119 |
| Dm | ICGDIHQYDYDRLRRLFYGGFPPESNYLFLGDYVDRGKQSLETICLLLAYKIKYAENFFL | 118 |
| Fh | ICGDIHQYDYDRLRRLFYGSFPPESNYLFLGDYVDRGKQSLETICLLLAYKIKYPENFFL | 120 |
| Mm | ICGDIHQYDYDRLRRLFYGGFPPESNYLFLGDYVDRGKQSLETICLLLAYKIKYPENFFL | 120 |

\*\*\*\*:\*\*\*\* \*\*\*\*\* .\*\*\*\*:\*\*\*\*\*:\*\*\*\*\*:\*\*\*\*\*:\*\*\*\*\*:\*\*\*\*\*

**PP2Ac**

|    |                                                               |     |
|----|---------------------------------------------------------------|-----|
| Sm | LRGNHECAA INRIYGFYDECKRRFSVRLWKTFTDCFNCLPIAAIVDSKIFCCHGGLSPDL | 178 |
| Hs | LRGNHECASNRIYGFYDECKRRFNKIKLWKTFTDCFNCLPIAAIVDEKIFCCHGGLSPDL  | 179 |
| Ce | LRGNHECASNRIYGFYDECKRRYNIKLWKTFTDCFNCLPVAAI IDEKIFCCHGGLSPDL  | 179 |
| Dm | LRGNHECASNRIYGFYDECKRRYTIKLWKTFTDCFNCLPVAAIVDEKIFCCHGGLSPDL   | 178 |
| Fh | LRGNHECASNRIYGFYDECKRRYNIKLWKTFTDCFNCLPIVAIVDEKIFCCHGGLSPDL   | 180 |
| Mm | LRGNHECASNRIYGFYDECKRRYNIKLWKTFTDCFNCLPIAAIVDEKIFCCHGGLSPDL   | 180 |

\*\*\*\*\*:\*\*\*\*\*:\*\*\*\*\*:\*\*\*\*\*:\*\*\*\*\*:\*\*\*\*\*:\*\*\*\*\*:\*\*\*\*\*:\*\*\*\*\*

**PP2Ac**

|    |                                                               |     |
|----|---------------------------------------------------------------|-----|
| Sm | QNMDQIRIRIMRPSDIPDTGLLCDLLWSDPDKDVNGWAENDRGVSFTFGPDVVTKFLNRHD | 238 |
| Hs | QSMEQIRIRIMRPTDVPDQGLLCDLLWSDPDKDVQGWGENDRGVSFTFGADVVTKFLNRHD | 239 |
| Ce | QSMEQIRIRIMRPTDVPDQGLLCDLLWSDPDKDVQGWGENDRGVSFTFGPEVVAKFLHKHD | 239 |
| Dm | SSMEQIRIRIMRPTDVPDQGLLCDLLWSDPDKDTMGWGENDRGVSFTFGAEVVGKFLQKHE | 238 |
| Fh | HSMEQIRIRIMRPTDVPDQGLLCDLLWSDPDKDIQGWGENDRGVSFTFGADVVTKFLHNHD | 240 |
| Mm | QSMEQIRIRIMRPTDVPDQGLLCDLLWSDPDKDVQGWGENDRGVSFTFGAEVVAKFLHKHD | 240 |

.\*:\*\*\*\*\*:\*\*\*: \*\*\*\*\*:\*\*\*\*\* \*\* .\*\*\*\*\* :\*\* \*\* :.\*:

**PP2Ac**

|    |                                                              |     |
|----|--------------------------------------------------------------|-----|
| Sm | MDLICRAHQVVEDGFEFFCRRQLVTLFSAPNYCGEFDNAGGMMSVDENLTCFSQILKPSE | 298 |
| Hs | LDLICRAHQVVEDGYEFFAKRQLVTLFSAPNYCGEFDNAGGMMSVDETLMCSFQILKPSE | 299 |
| Ce | LDLICRAHQVVEDGYEFFAKRQLVTLFSAPNYCGEFDNAGSMMTVDETLMCSFQILKPAD | 299 |
| Dm | FDLICRAHQVVEDGYEFFAKRQLVTLFSAPNYCGEFDNAGAMMSVDDTLMCSFQILKPAD | 298 |
| Fh | LDLICRAHQVVEDGYEFFAKRQLVTLFSAPNYCGEFDNAGAMMSVDESLTCFSQILKPAD | 300 |
| Mm | LDLICRAHQVVEDGYEFFAKRQLVTLFSAPNYCGEFDNAGAMMSVDETLMCSFQILKPAE | 300 |

:\*\*\*\*\*:\*\*\*:\*\*\*\*\*:\*\*\*\*\*:\*\*\*\*\*:\*\*\*\*\*:\*\*\*\*\*:\*\*\*\*\*:\*\*\*\*\*:\*\*\*\*\*

|    |                                          |     |
|----|------------------------------------------|-----|
| Sm | KKA-KYQYQGVNTTGNQARLPARIP-----           | 322 |
| Hs | KK-KAYQYGLNSG--RPVTPPRTANPPKKR-----      | 327 |
| Ce | KKKYPYAGGVGSN--RPVTPPRNAPAAQPKKGAKK----- | 333 |
| Dm | KRRFVYPNFGS-SG--RPLTPPRGANNKNNKK-----    | 327 |

```

Fh      KKKFNLGSLN--AV--WPVTPPRNTKLDK----- 326
Mm      KKKPN-----AT--RPVTPPRVGSGLNPSIQKASNYRNNTVLYE 337
* :           :           * *

```

**Proteasome subunit beta type 7 (Psm7):**

```

Ce      MATADVSTVPHMDMRGGAFDFSNCRNQAM----CKMGGKAPKLTSTGTTIVAVAFKG 56
Fh      ----- 0
Sm      -----MSSLVDDRSGGFSFENCYRNKLI----EQKGFELPKAVKTGTTICGVVFKN 48
Dm      -----MDLDNARDLPRAGFNFDNCKRNATL----LNRGFKPPTTTKTGTTIVGLIYKD 49
Hs      -----MAAVSVYAPPVGGFSFDNCRNAVLEADFAKRGYKLPKVRKTGTTIAGVVYKD 53
Mm      -----MAAVSVFQPPVGGFSFDNCRNAVLEADFAKKGFKLPKARKTGTTIAGVVYKD 53

```

**Proteasome**

```

Ce      GLVMGADSRATAGNIIADKHCEKVHKLTE  
Fh      -----MTLSFCSCCGAGTAADTEM  
Sm      GVVLGADTRATEGTVVAEKNC  
Dm      GVILGADTRATEGPIVSDKNC  
Hs      GIVLGADTRATEGMVVADKNC  
Mm      GIVLGADTRATEGMVVADKNC

```

**Proteasome**

```

Ce      GRKARVITALRQAKQHLEFN-----YQGYIGAYLLIGGVDPTGPHLYMCSANGTT 165
Fh      GRQPRVILPLRLLKDYLFGRVSLFRVLEIFQGYVGAALILGGVDYQGP  
Sm      GRTPRVIAPLRLLLKRYLYQ-----YQGYVGAALVGGVDSTGPHLYSIAPHGST 157
Dm      DREVRVVAANTMLKQMLFR-----YQGHISAALVGGVDKTGPHIYSIHPHGSS 158
Hs      GRLPRVVTANRMLKQMLFR-----YQGYIGAALVGGVDVTGPHLYSIYPHGST 162
Mm      GRLPRVVTANRMLKQMLFR-----YQGYIGAALVGGVDVTGPHLYSIYPHGST 162

```

**Proteasome**

```

Ce      MAFPFTAQSGSGSYAAITILERDFKVDMTKDEAEKLVQRALEAGMHGDNASGNSLNLVIE 225
Fh      DKLPYITMGSGLAALS  
Sm      DKLPYITMGSGLACMSVLES  
Dm      DKLPYATMGSGLAAMTVFES  
Hs      DKLPYVTMGSGLAAMAVFEDKFRPDME  
Mm      DKLPYVTMGSGLAAMAVFEDKFRPDME

```

**Pr\_beta\_C**

```

Ce      PSETVFKGPVPEFCRPEPNDLVYKFOAGATKVLKHKTYK--YDVVES----- 272
Fh      KDSTEYIRPHDVAN--KKGQRASKYNLPPGSTAVLSQKIQPVEYDVVTRVIRDLDPDKT 213
Sm      KDGTTYIRSYDEAN--VKGKRAEKYNPPEGTTSVLHKS  
Dm      KGSVEYLRNYELAN--KKGKRQLDYRFKTGTSTVLHTNIKDLLVTERVQAV----- 267
Hs      KNKLDFLRPYTPVFN--KKGTRLGGRYRCEKGTAVL  
Mm      KSKLDFLRPFSVFN--KKGTRLGGRYRCEKGTAVL

```

```

Ce      --MDITH 277
Fh      EAMDTS- 219
Sm      ETMDLS- 281
Dm      -PMEIS- 272
Hs      QTMDTS- 277
Mm      QTMDTS- 277
* : :

```

**Supplementary Figure S9: Multiple alignment of amino acid sequences of orthologs for kinase genes.** Accession numbers of gene orthologs for *C. elegans* (Ce), *F. hepatica* (Fh), *S. mansoni* (Sm), *D. melanogaster* (Dm), *H. sapiens* (Hs) and *M. musculus* (Mm) are listed in Supplementary Table S1. Conserved protein domains are highlighted. \* indicates identical amino acids.

**ABL proto-oncogene 1, non-receptor tyrosine kinase (Abl1):**

|    |                                                                 |         |
|----|-----------------------------------------------------------------|---------|
| Fh | -----                                                           | 0       |
| Sm | -----                                                           | 0       |
| Ce | -----                                                           | 0       |
| Dm | MGAQQGKDRGAHSGGGGSGAPVSCIGLSSSPVASVSPHCISSSSGVSSAPLGGGSTLRGS    | 60      |
| Hs | -----                                                           | 0       |
| Mm | -----                                                           | 0       |
|    |                                                                 |         |
| Fh | -----MG---GNSG-----KLATSK-----                                  | 12      |
| Sm | -----                                                           | 0       |
| Ce | -----MGHSHSTGKEIN-----DNELFTCEDPVFDQPVAS                        | 30      |
| Dm | RIKSSSSGVASGSGSGGGGGGSGSGLSQRSGGHKDARCNPVGLNIFTEHNEALLQS--R     | 118     |
| Hs | -----MLEICLK-----LVGC--K                                        | 12      |
| Mm | -----MISFD-----LLS----                                          | 8       |
|    |                                                                 |         |
| Fh | -----NGHLQSPRLSSN-----SQNVEGTRTGN--SSYQ--ER                     | 41      |
| Sm | -----MSRVDTSDLKSN-----PKPADLN-----KVD--DK                       | 24      |
| Ce | PKSEISSKLAEEIERSKSPLILEMFRPTFDTRPPNSDSST--FR-----GSQSRE--DL     | 81      |
| Dm | PLPHIPAGS-----TAASLL-----ADAAELQQHQQDSGGLGLQGSSSLGGGHSSTTSVF    | 167     |
| Hs | SKK---GL-----SSSSSC---YLEEALQRP-----VASDFEPQGL                  | 42      |
| Mm | --D---EL-----HLKLLV-----LDVEALQRP-----VASDFEPQGL                | 36      |
|    |                                                                 |         |
|    | :                                                               | .       |
|    | <b>SH3</b>                                                      |         |
| Fh | GSNSSYPLDINCQ--SASETAVHTDKEELMVVLYDFTE SMRSQISIKRGELVRLLLGYSPAG | 99      |
| Sm | LSDIRSYTKMDVQ--SSSDSLVLGRGGIMVVLYDFSE SMSSQISIKRGELVRLLLSYSPAG  | 82      |
| Ce | VACSSMNSVNNVHDMNTVSSSSSSSAPLFFVALYDFHGVGEEQLSLRKGQVRI LGYNKNN   | 141     |
| Dm | ESAHRWTSKEN----LLAPGPEEDDPQLFVALYDFQAGGENQLSLKKGEQVRI LSYNKSG   | 223     |
| Hs | SEAARWNSKEN----LLA-GPSENDPNLFVALYDFVASGDNTLSITKGEKLRV LGYNHNG   | 97      |
| Mm | SEAARWNSKEN----LLA-GPSENDPNLFVALYDFVASGDNTLSITKGEKLRV LGYNHNG   | 91      |
|    | :                                                               | *:*.*** |
|    | <b>SH3</b>                                                      |         |
| Fh | DWSEVETSGLAHPATHPMMETELTNTSTQPSQTQIKSDLTTQRDSVGP GVGGGSTMTG     | 159     |
| Sm | DWSEVEASLVLPPLPKPGPGSSTSGSESHPSQCKGGAT---VKH-----SHGPTMETG      | 132     |
| Ce | EWCEARLYSTRK-----                                               | 153     |
| Dm | EWCEAHS-----                                                    | 230     |
| Hs | EWCEAQT-----                                                    | 104     |
| Mm | EWCEAQT-----                                                    | 98      |
|    | *:*.*..                                                         |         |
|    | <b>SH3</b>                                                      |         |
| Fh | SGHSINNSAFGNAPVRYRRGWVPTSYLAPANVLSDPNQRLTGHF LPHEVIFPSVGTSSM    | 219     |
| Sm | N--SV-NTSCNYLFNRYRRGWVPTSYLATANVFQSSAPSKQ--SYPQQLI-GCEGS--EK    | 184     |
| Ce | -----NDASNQRRLGEIGWVPSNFIAPYNS-----                             | 178     |
| Dm | -----DSGNVGWVPSNYVTPLNS-----                                    | 248     |
| Hs | -----KNG-QGWVPSNYITPVNS-----                                    | 121     |
| Mm | -----KNG-QGWVPSNYITPVNS-----                                    | 115     |
|    | ****:..::                                                       | *       |
|    |                                                                 |         |
| Fh | ERCNVTGMDSKVNVLVSGPSPMLVMRPQMGSRSHSSAQATQQQFQPQTNMVDSSPLGLQG    | 279     |
| Sm | PNCsvnAP-----CLSNS--QSI IANDNMQSR----VQNVSNKGPVHHVMMDSPLSLLE    | 233     |
| Ce | -----                                                           | 178     |
| Dm | -----                                                           | 248     |

Hs ----- 121  
Mm ----- 115

**SH2**

Fh PSLVLVYPWYHGAVSRHAGEQLLRSGITGSFLVRASESAPGQLSVTVRHLGRVYHYRISQD 339  
Sm PSLLPYSWYHGAVSRQAGEHLLRSGITGSFLVRASESAPGQLSVTVRHLGRVYHYRISQD 293  
Ce --LDKYTWYHGKISRSDSEAILGSGITGSFLVRESETSIGQYTI SVRHDGRVFHYRINVD 236  
Dm --LEKHSWYHGPI SRNAAEYLLSSGINGSFLVRESESSPGORSISLRYEGRVYHYRISED 306  
Hs --LEKHSWYHGPPVSRNAAEYLLSSGINGSFLVRESESSPGORSISLRYEGRVYHYRINTA 179  
Mm --LEKHSWYHGPPVSRNAAEYLLSSGINGSFLVRESESSPGORSISLRYEGRVYHYRINTA 173  
\* : \*\*\*\* : \* \* . \* : \* \* \* . \* \* \* \* \* \* \* \* : \* \* : : : \* : \* \* : \* \* \* .

**SH2**

Fh VRGLFYITNVHRFPVTVVQLIDHHSRS--ADGLVLCPLLYPVPKLYPTSHMTSVAYSSVPT 397  
Sm SRGLFYITEAHRFPVTVVQLIEHHSRS--ADGLVLCPLLYSVPKQFLNQPMQOQSCYSSVQP 351  
Ce NTEKMFITQEVKFRITLDELVHHHSVH--ADGLICLLMPASKKDKGRGL----- 283  
Dm PDGKVFVTVQEAQFNTLAELVHHHSVPEHGHLITPLLYPAPKQNKPTV----- 354  
Hs SDGKLYVSSESRFNTLAELVHHHSTV--ADGLITTLHYAPKRNKPTV----- 225  
Mm SDGKLYVSSESRFNTLAELVHHHSTV--ADGLITTLHYAPKRNKPTI----- 219  
.: : . : \* \* : : \* . \* \* \* . \* \* \* : \* \* \* . \* \* . \* :

Fh HAIPSHPHTHLIGGAAQITLPPVTPHPSADSST--TGPDQASFHPRPHNTAQOQMEPF 454  
Sm TLPSSR-----IPGNQFEVNPVIVHQSNAEISNFPLTHINPVSHVPRPFHPSH--INNSE 404  
Ce ----- 283  
Dm ----- 354  
Hs ----- 225  
Mm ----- 219

**TyrKc**

Fh GLSRTDEPFRKQSWDGWEIDRNEILMRQKLGCGQYGDVYEAIWKRLNTVVAVKTLKQDVN 514  
Sm RLSACSDSIGSMEFDGWEIDRSEIIMRQKLGCGQYGDVYEAIVWKRFSVVAVKTLKQDVN 464  
Ce -----FSLSPNAPDEWELDRSEIIMHNKLGCGQYGDVYEGYWRHDCTI AVKAL KEDA- 336  
Dm -----FPLSPE-PDEWEICRTDIMMKHKLGGGQYGEVYEAIVWKRYGNTVAVKTLKEDT- 406  
Hs -----YGVSPN-YDKWEMERTDITMKHKLGGGQYGEVYEGVWKYSLTVAVKTLKEDT- 277  
Mm -----YGVSPN-YDKWEMERTDITMKHKLGGGQYGEVYEGVWKYSLTVAVKTLKEDT- 271  
. \* \* \* : \* \* : \* \* : \* \* : \* \* \* : \* \* \* : \* \* : \* \* : \* \* : \* \* .

**TyrKc**

Fh LNVNDFLKEASIMKCLRHRNLVQLLGVCTREPPYLIITEYMSNGNLLNYLRTRSPGELTP 574  
Sm LNVNDFLKEAAMKCLRNRNLVQLLGVCTREPPYLIITEYMPNGNLLNYLRTRSPGELTP 524  
Ce MPLHEFLAEAAIMKDLHKNLVRLLGVCTHEAPFYIITEFMCNGNLLLEYLRRTDKSLLPP 396  
Dm MALKDFLEAAIMKEMKHPNLVQLIGVCTREPPFYIITEFMSHGNDLDFLRSAGRETLDA 466  
Hs MEVEEFLKEAAMVKEIKHPNLVQLLGVCTREPPFYIITEFMTYGNLLDYLRECNRQEVNA 337  
Mm MEVEEFLKEAAMVKEIKHPNLVQLLGVCTREPPFYIITEFMTYGNLLDYLRECNRQEVSA 331  
: : : \* \* \* \* : \* \* : \* \* : \* \* : \* \* : \* \* : \* \* : \* \* : \* \* : \* \* : \* \* : \* \* : \* \* .

**TyrKc**

Fh PVLLYMAVQIASGMSYLEANNFIHRDLAARNCLVGERHLIKVADFGGLARYMQRQDITYTAR 634  
Sm LTLLYMAVQIASGMAYLEANNFIHRDLAARNCLVGDQHLIKVADFGGLARYMQRQDITYTAR 584  
Ce IILVQMASQIASGMSYLEARHF IHRDLAARNCLVSEHNIVKIADFGGLARFM--KEDTYTAH 455  
Dm VALLYMATQIASGMSYLESRNYIHRDLAARNCLVGDNKLKVVADFGGLARLM--RDDTYTAH 525  
Hs VVLLYMATQIISAMEYLEKKNFIHRDLAARNCLVGENHLVKVADFGGLSRLM--TGD TYTAH 396  
Mm VVLLYMATQIISAMEYLEKKNFIHRDLAARNCLVGENHLVKVADFGGLSRLM--TGD TYTAH 390  
\* : \* \* \* \* : \* \* \* \* . : : \* \* \* \* \* \* \* \* \* \* . : : : : \* : \* \* \* \* : \* \* \* \* \* \* :

**TyrKc**

Fh NGAKFPIKWTAPEGLAYYVFSKSDVWAFGVVWELATYGLSPYPGVELHDVYHILEKGY 694  
Sm NGAKFPIKWTAPEGLSYLLVFSKSDVWAFGVVWELATYGLSPYPGVELHDVYHILLEKGY 644  
Ce AGAKFPIKWTAPEGLAFNTVFSKSDVWAFGVLLWEIATYGMAPPYPGVELSNVYGLLENGF 515  
Dm AGAKFPIKWTAPEGLAYNKFSKSDVWAFGVLLWEIATYGMSPYPYPAIDLTDVYHKLDKGY 585  
Hs AGAKFPIKWTAPESLAYNKFSIKSDVWAFGVLLWEIATYGMSPYPYPIDLSQVYELLEKDY 456  
Mm AGAKFPIKWTAPESLAYNKFSIKSDVWAFGVLLWEIATYGMSPYPYPIDLSQVYELLEKDY 450  
\* \* \* \* \* \* \* \* \* \* . \* : \* \* \* \* \* \* \* \* \* \* : \* \* \* \* \* \* \* \* \* \* : \* \* \* \* \* \* \* \* \* \* : \* \* \* \* \* \* \* \* \* \* .

**TyrKc**

Fh RMERPHGCPEAVYSIMLRCAWAEASLRPSFTEVHAELEQMYTTMNI EA EVARELEKRHAA 754  
Sm RMERPHGCPEAVYSIMLRCSWDPNLRPSFSEIHAEELEQMYTTMNI EA EVALEL GKQPAN 704  
Ce RMDGPQGCPPSVYRLMLQCNWNSPSDRPRFRDIHFNLENLISSNSLNDEVQQLKKNNDK 575

Dm RMERPPGCPPEVYDLMRQCWQWDATDRPTFKSIHHALEHMFQESSITEAVEKQLNANATS 645  
Hs RMERPEGCPEKVYELMRACWQWNPSDRPSFAEIQAFETMFQESSISDEVEKELGKQGVR 516  
Mm RMERPEGCPEKVYELMRACWQWNPSDRPSFAEIQAFETMFQESSISDEVEKELGKRGRTR 510  
\*: \* \*\*\* \*\* : \* \* \* . . \* \* \* . : \* : : . : \* : \* .

Fh FTAASSNNQPTGEPSEPVRLDGTGDL----- 780  
Sm FIPQQQQQPLVSS--NRFTEIQPHDLQGN-----SVNQFNMVFKESLPSSVIPTEIVNS 756  
Ce KLESDKRRSNVRERSD-----SKSRHSSHHD--RDRDRESLHSRN----- 613  
Dm ASSSAPSTSGVATGGGATTTTAASGCASSSSATASLSLTPQMV-KKGLPGG----- 695  
Hs GAVSTLLQAPE-----LPTKTRTSRRAAEHR-DTTDVPEMPHSGQGES----- 559  
Mm GGAGSMLQAPE-----LPTKTRTCRRAAEQK-DAPDTPPELLHTKGLGES----- 553

Fh -----FVDVRCSGSMSAHGVIEPLNPNTISNSIWL--ATDSVHHSSQAA 823  
Sm DHII SRHNNAIHSTSNIDFTCNAT-----ESSRPNPVSSYVIMNSVANHSIHVVENN 809  
Ce -----SNPE 617  
Dm -----QALTPN-----AHNDPHQQQAS 713  
Hs -----DPLDHE-----PA-VSPL 571  
Mm -----DALDSE-----PA-VSPL 565

Fh HP---SGL-----PNRDVHEGPVRPDVDGG-----DEIQAD 851  
Sm IASLNNNIHNCMKKEKTIFIDQN-----RLSKDKHSVLPYPSSSGGGVGGSDRFDLI 861  
Ce IPNRSFIRTDSDSVS---FFNPST---TSKVTSFRAQGPPFPFPQNTKP---KLLKSV 667  
Dm TPMSETGSTSTKLS---TFSSQKGNVQMRRTTNKQKQAPAPPKRTS-----LLSS 763  
Hs LPRKERGPPEGGLNEDERLLPKDKKTNLFSALIKKKKKTAPTTPPKRSS-----SFREM 624  
Mm LPRKERGPPDGSLNEDERLLPRDRKTNLFSALIKKKKMAPTPPKRSS-----SFREM 618

Fh -D-----GDEDDEEGEF-DESDEEDAQQQWH-EHSNAIQQ-----PSDHMARSPEPASS 897  
Sm -TDNLAAVSLDNNNDI-DNSDDDDENKRPASSNNHAVQYESNSETNPDHMLL---PTSS 916  
Ce LNSNARHASEEFERNE-QDDVVPLAEKN-VR-KAVTRLGG-----T---MP---K 708  
Dm RDSTYRE---EDPANARCNFIDDLSTNG-LA-RDINSLTQRYDSETDPAA---DPDTPAT 815  
Hs DGQPERRGAGEEEGRDISNGALAF-----TP--LDTADPAK---SPKPSN- 664  
Mm DGQPDRRGASEDDSRLELCNGPPAL-----T---SDAAEPTK---SPKASN- 657

Fh SNVVGALSRYHVS DPTVVPNALEGVSPA HMDRLCGQIRAMSLAPR---DGSHLCRTSKS 954  
Sm ---LGQ-----IKFLPNSV-----ISSCSPQMTSIHESQNGFSNLIQCRTPFS 957  
Ce GQRIDAYL-----DSMRRVD----- 723  
Dm GDSLEQSLSQV--IAAPVTNKMQH-----SLHSGGGGGIGPR----- 851  
Hs GAGV-----PN---G-----ALRESGGSGFRSPH----- 685  
Mm GAGV-----PN---G-----AFREPGNSGFRSPH----- 678

Fh GRWDDNTS-QVAMFASQSPVPI TQGQRYT PPNVGG LPSAQPHRDLVI----- 1002  
Sm SNYLTQTQYSPASLSDNGFLPFGEKLCYFIPMSN---NPSYQPNSHITSSNITQN---CG 1011  
Ce -----SWKESTDA-----DNEGA 736  
Dm -----SSQQH----- 856  
Hs -----LWKKSSTLTSSRLATGEEEGG 706  
Mm -----MWKKSSTLTGSRLAAAEESG 699

Fh -----GDVPNSSASNSKHRPMAATSSQSMNSAGYARE-KSDRSTSARPG 1045  
Sm ISNLSQFSNNNPASIVSKIPLNVANST-----KVVNDRSAIRTNRSIHRNVTS GC 1062  
Ce GS--SSLRSTVSNDSL-----TLPLPDSMNSSTYVKMH-----PASGE 773  
Dm ----SSFKRPTGTPVMG-----NRGLETRQSKRSQLHSQAPGPPSTQ-----PHHGN 901  
Hs GSSSKRFLRSCSASCVP---HGAKDTEWR---SVTLPRDLQSTGRQFDS-----STFGG 754  
Mm MSSSKRFLRSCSASCMP---HGARDTEWR---SVTLPRDLPSAGQFDS-----STFGG 747

Fh RSRVCRTRDGTTRSRTDTPDESGVGESII SNDSPADS---GGGVIGSA-PVNIMSTDRV 1101  
Sm NTQTSSQONGTTRSQDTPDESGVGESII SNESPAESRACGGGIMSNAAGVVIATMNS 1122

Ce NVFLRQIRS--KLKKRSETPELDHIDSDTADETTKSEKSPF--GSLNKSSIKYPIK---- 825  
Dm NGVVTSAHP---I-T-----VGALDVM-NVKQVVNRY--GTLPKGARIGAYL---- 941  
Hs HKSEKPALP---R-KRAGENRSDQVTRGTVT-PPPRLVKKN-----EEAADEVFK---- 799  
Mm HKSEKPALP---R-KRTSESRSEQVAKSTAM-PPPRLVKKN-----EEAAEEGFK---- 792

Fh LSLASACKTA---DTPSVLNTF--AQAKTSHPANL-----VSQSSVP--AGLPSHEVFQP 1149  
Sm ILSSAPSQVDWHFNVPFEVSMPIDDHSQHFFHHAQI-----ITPTSNS--V-IHHPHSYPY 1174  
Ce -----NAPE----FSENHSR-VSP----- 839  
Dm -----D----SLEDSS-EAAPA-LP---ATAPSLPPANGHA----- 968  
Hs -----D----IMESSPG-SSPPNLTpkPLRRQVTVAPASGLPHKEE--- 835  
Mm -----D----T-ESSPG-SSPPSLTPKLLRRQVTASPSGLSHKEE--- 827

Fh LCTAVGTAASSMSTV-LTQGTTRTVSQP-ALRLDAEAMDQFATLPPQDRIGRYLESIN-- 1205  
Sm LFQTTNTSTTRITTTTTINTTTTTISSASSTQFNVNPLMEQFSTIPPHDRIGSYLKSLG-- 1232  
Ce -----VPVPPSRNAS-----VSV 852  
Dm -----T-----P----PAARLNPKASPIPPQQMIRSNSSGGVTM 998  
Hs -----AGKGS-----A-----LGTAAAAEPVTPTSKAGSGAPGGTSK 867  
Mm -----ATKGS-----A----SGMGTATAEPAPPSNKVG-----LSK 855

\*

Fh -----E-----IGSE-LPSTTSTTTSAQAQTRFYLNHGAVEQQQ---LLLQQRQQQP 1248  
Sm -----E-----LDTG-CGRHRCNE----PPTFTYHQSQPNELHLPTDILDVN-DKT 1273  
Ce RPDSKAEDSSDETTKDVGMWGPKHAVTRKIEIVKND-----S-----YPNV--EGE 896  
Dm QNNAASLNK-----L--QRHRTTTEGTMFTSSFRAGGSSSSP-KRSASGV--ASG 1045  
Hs GPA---EESR-----V--RRHKH-----SSESP-GRDK-----G 890  
Mm ASS---EEMR-----V--RRHKH-----SSESP-GRDK-----G 878

Fh LSTNSLFFLQYPPPPPPPL---PVHTVPIISLSPPYVPQDNEA----LFTA-N--PMTASY 1298  
Sm -FNHPSNVLHYPPPPPPVPP-PPHSSIMECCNPPSLPPTSTTNNASIQLSSD--VTSTGE 1329  
Ce -LKAKIRNLRHVPKE-----ESNT-----SSQED----LPL--- 922  
Dm -VQPALANLEFPPPPPLDLPPPEEFE----GGPPPPPPAPESAVQAIQQHLHAQLPNNGN 1100  
Hs ----KLSRLKPA-----PPPPAASAGKAGGKPSQSPSQEAAGEAV----- 927  
Mm ----RLAKLKPA-----PPPPACTG--KAGKPAQSPSQEAAGEAGG----- 913

\*

Fh LSE-----TQSASNL----RP-QNHE-----LTARLE 1320  
Sm ISK-----SNISQIPISVLR-S-KQYF-----HSKAIT 1355  
Ce ---DATDNTN-----DSIIVI PRDEKAKVRQLVTQKVSPLQHHRPFSLQCPNNSTSSAIS 974  
Dm ISNGNGTNNNDSSHNDVSNIAPSVEEASSRFG-----VSLRKREPSTDCSSSL----- 1148  
Hs ----LGAKTKATSLVDAVNSDA-----AKP----- 948  
Mm ----PTKTKCTSLAMDAVNTDP-----TKA----- 934

Fh DSSH-----G-----YL----- 1327  
Sm DSET-----G---TNMDQP----- 1366  
Ce HSEHADSSSETSSLGVEEERMKPELPRKRSN-----GDTKVVPVTWI 1016  
Dm -----GSPPEDLKEKLITEI-----KAAGKDTAPASHLANGSGIAVVDVPSLL 1191  
Hs -----SQPGEGLKPKVLPATPKPQS-AKPSGTPISPAPVP----- 982  
Mm -----GPPGEGLRKPVPSPKPKQSTAKPPGTPTSPVSTP----- 969

Fh -----TRCN---- 1331  
Sm -----TNCFSSNN 1374  
Ce INGE-----KEPNGMAR-----T 1029  
Dm VTELAESMNLKPPPPQQQKLTNGNSTGSGFKAQLKKEVPPKMSAPMPKAEFANTIIDFK 1251

Hs -----STLPSASS-----ALAGDQPSSTAF-----IPLISTR 1009  
Mm -----STAPAPSP-----LAGDQQPSSAAF-----IPLISTR 996

Fh -----NGINVGNTG-----TGNCSSAKE-----SGSKYFRCSSNQPRQRRL 1368  
Sm QNLSQLKASSEQNNIAVDESSLNHNNSNSNNSDIKDLH---SNTSYS--KISQPRRRIKV 1429  
Ce KSLRDITSKFEQLGTASTIESKI---EEAVPYREHAL-EKKGTSKRFSMLEGSNELKHVV 1085  
Dm AHLRRVDKEKEPATPAPAP-ATVAVANNANCNTTGTILNRKEDGSKKFSQAMQKTEIKIDV 1310  
Hs VSLRKTRQPPERIASGAIKGVVLDSTEALCLAIS---RNSE----- 1048  
Mm VSLRKTRQPPERIASGTITKGVVLDSTEALCLAIS---RNSE----- 1035

Fh KN-----GQSDGEGRRRESL-ERSGEESNTEEVTRSGE---EETLSLASESPSPN 1415  
Sm DTERAVSGNAGHLDYPGVGRRLPLDDRSEESNTEEVPRSLE---DETLSIASDSPNNS 1486  
Ce -----PPRKNRN- 1092  
Dm T-NSNVEADAGAAGEGDLGKRRSTDD---EEQSHTEGLGSGGQGSADMTQSLYEQKPKQIQ 1366  
Hs -----QMASHSAVLEA-G----- 1060  
Mm -----QMASHSAVLEA-G----- 1047

Fh GDDPVSTNRAIELNGTDLASEEHDTEADDVYQAPEACYSMIAASCGAGNTSAASIVHDGD 1475  
Sm QDNSMSIKPDADLSG-----GGEGDDVYQAPDSYYLPNINNSNSQNLQPN-----S 1532  
Ce -----QDESGSIDEEP 1103  
Dm QKPAVP-----HKPTKLTIIYATPIAKL-----TEPASSASSTQ 1399  
Hs ----- 1060  
Mm ----- 1047

Fh SLPKSLPSLITRRLERLIDELVRLTQSV-SDNTVCDNNPELALLQVTDTLDAFRAEVEAYV 1534  
Sm TSQESITNL---LERTIE-LVNWTKDLCSYCEMEYEIPNASFIELSNCLDSFRIELEAYI 1588  
Ce VSKDMIVSLLKVIQKEFVNLFNLASSEI-----TDEKLQQFVIMADNVQKLHSTCSVYA 1157  
Dm ISRESILELVGLLEGSLK-----HPV-----NAIAGSQWLQLSDKLNILHNSCVIFA 1446  
Hs -----KNLYTFCVSYV 1071  
Mm -----KNLYTFCVSYV 1058

. : :

Fh VCRETNLDGLPTTVLHACDMLGRQTSLLAFEIGSADTSMTVDTGDSTTQRSRNPWSSLCT 1594  
Sm VEHISINPDLTKTILILCDNLGKQTTNLSLHLKTMEV-----DKPAFVSHCN 1635  
Ce EQ---IS---PHSKFRFKELLS-----QLEIYNRQIKFSHNP-----RAKPVDDKLM 1199  
Dm ENGA-MP---PHSKFQFRELVT-----RVEAQSQHLS-----AGSKNVQDNERLVA 1489  
Hs DS-I-QQ---MRNKFAFREAIN-----KLENNLRELQICPAT-AGSGPAATQDFSKLLS 1119  
Mm DS-I-QQ---MRNKFAFREAIN-----KLESNLRELQICPAT-ASSGPAATQDFSKLLS 1106

. : : : . . .

Fh SILPALEDLLKNLVRLRGVESISS---SEVSSNEKP---ESSNSNERPTAIAGPASDR 1647  
Sm SCHSCLKEIHEHIVQLLNKSKVTNAVSTITLTTGSTTSVTNQTHLHNDRSFSTTD-NTTT 1694  
Ce AFQDCFDQIMRLVDR----- 1214  
Dm EVGQSLRQISNALNR----- 1504  
Hs ----SVKEISDIVQR----- 1130  
Mm ----SVKEISDIVRR----- 1117

.. :: : :

Fh RVCGSVVLGKV 1658  
Sm TTTTTHVFGKV 1705  
Ce ----- 1214  
Dm ----- 1504  
Hs ----- 1130  
Mm ----- 1117



**ABL proto-oncogene 2, non-receptor tyrosine kinase (Abl2):**

|    |                                                                 |              |
|----|-----------------------------------------------------------------|--------------|
| Fh | MPTKMVGIKHTLDSSINTIGKLLKKEVTNQMTKRPGYCHVKHKTWFRKVC SRHLLSEGQRG  | 60           |
| Dm | -----                                                           | 0            |
| Ce | -----                                                           | 0            |
| Sm | -----                                                           | 0            |
| Hs | -----                                                           | 0            |
| Mm | -----                                                           | 0            |
|    |                                                                 |              |
| Fh | SADPDPLGKTNYNFLVLECNQGDPTPTVLDQSSRAGSDRRPQIPYKMTMSDFVSGSINES    | 120          |
| Dm | -----                                                           | 0            |
| Ce | -----                                                           | 0            |
| Sm | -----                                                           | 0            |
| Hs | -----MGQQVGRVGEAPGLQQPQPRGI-----RG---SS                         | 26           |
| Mm | -----MGQQVGRVGEAPGLQQPQPRGI-----RG---SS                         | 26           |
|    |                                                                 |              |
| Fh | NLPSNGRLRSATH-NACPIKGSIKRSPESGTEINSTNPGNMMNASNQSAAFIPPGA--QI    | 177          |
| Dm | -----MGNCLTTQKGEPAKPA-----DRIKLDPPPTI                           | 27           |
| Ce | -----MGSCIGKEDPPPATS-----PVHTSSTL                               | 24           |
| Sm | -----MGAQHTK---E---RPR---R                                      | 12           |
| Hs | AARPSGRRRDPAGRTTETGFNIFTQHE-----ALH---R                         | 57           |
| Mm | AARPSGRRRDPAGRTADAGFNVFTQHDHFASCVEDGFEGDKTGGSSPE----VLH----R    | 78           |
|    |                                                                 |              |
|    |                                                                 | <b>SH3</b>   |
| Fh | LVDCGLA----TALPTSASFGHMSEVNLGTTSTGTTVTSTITATTSSANSSGSENLYVAL    | 233          |
| Dm | GVGVGVP---QIPMP SHAGQ---PPEQI-----RPVPQIP-----ESETAGANAKIFVAL   | 71           |
| Ce | ----G-----RESLPSHPRI---PS--I----GPIAASSSGNTIDKNQNISQSANFVAL     | 65           |
| Sm | TYHPKVDHELQINTSTSWIQNHNPPTNF----KGS-----VAHTSQINQPSDQLLIAL      | 61           |
| Hs | PYGC DVE-PQALNEAIRWSSKEN----L---L-----GATESDPNLFVAL             | 94           |
| Mm | PFGCDAE-SQALNEAIRWSSKEN----L---L-----GATESDPNLFVAL              | 115          |
|    | :                                                               | :**          |
|    | <b>SH3</b>                                                      |              |
| Fh | HDYVKR----VDDDLNMTKGQTFRILDRS-HCDW WYAECTTTGQRGYVPKNHLARV----   | 284          |
| Dm | YDYDAR----TDEDLSFRKGEHLEILNDT-QGDW W LARSKKTRSEGYIPSNYVAKL----  | 122          |
| Ce | FQYDAR----TDDDL SFKKDDILEILNDT-QGDW W FARHKATGRTGYIPSNYVARE---- | 116          |
| Sm | FDFTPPNLTENQSQVRVEKGDRLQLFGYSADGDWSDVEECIRTNERGWIPNTYTGRI PVPP  | 121          |
| Hs | YDFVAS----GDNTLSITKGEKLRVLGYNQNGEWSEVRS--KNGQGWVPSNYITPV----    | 144          |
| Mm | YDFVAS----GDNTLSITKGEKLRVLGYNQNGEWSEVRS--KNGQGWVPSNYITPV----    | 165          |
|    | ... : . * . : : : : . . : * . . . * : : * . *                   |              |
|    |                                                                 | <b>SH2</b>   |
| Fh | -----TSLESNEWYFGELRRIEAEHYL                                     | 306          |
| Dm | -----KSIEAEPWYFRKIKRIEAEKKL                                     | 144          |
| Ce | -----KSIESQPWYFGKMRRIDA EKCL                                    | 138          |
| Sm | NDHSTTLNTGSASGSSLTFQHTSSHDVSCNGSQGSLARVGLSEKWHYHGAIQRSYAEYL-    | 180          |
| Hs | -----NSLEKHSWYHGFPVRSAAEYL-                                     | 165          |
| Mm | -----NSLEKHSWYHGFPVRSAAEYL-                                     | 186          |
|    | . : * . ** . : * **                                             |              |
|    | <b>SH2</b>                                                      |              |
| Fh | QLPGNDHGSFLVRVSESQSSEYSLSVREEDTIKHYRIRSRSSRTNPDLKRFYISRQLPFV    | 366          |
| Dm | LLPENEHGAFLIRDSESRHNDYLSVRDGDTVKHYRIRQL-----DEGGFFIARRTTFR      | 198          |
| Ce | LHTLNEHGAFLVRDSESRQHDL SSVRENDSVKHYRIRQL-----DHGGYFIARRRPF A    | 192          |
| Sm | -LNSGITGSFLIRESESHPGQLTISLRYEGQIWHYRIHRD-----DSNMYVIESNKFT      | 233          |
| Hs | -LSSLINGSFLVRESESSPGQLSISLRYEGRVYHYRINTT-----ADGKVYVTAESRFS     | 218          |
| Mm | -LSSLINGSFLVRESESSPGQLSISLRYEGRVYHYRINTT-----TDSKVYVTAESRFS     | 239          |
|    | * : * : * * * * : : : * * . : * * * * . : :                     |              |
|    | <b>SH2</b>                                                      | <b>TyrKc</b> |
| Fh | TIQQLVGHY TENQSGLC CRLSRPCIKPTHPEPVGLSHK LIDKWEISKSSIVLKERIGQGQ | 426          |
| Dm | TLQELVEHYSKSDSGLCVNLCKPCVQIEKPVTEGLSHRTRDQWEIDRTSLKFV RKLGSQG   | 258          |
| Ce | TLHDLIAHYQREADGLCVNLGAPCAKSEAPQTTTF--TYDDQWEVDRRSVRLIRQIGAGQ    | 250          |
| Sm | SVSDLVHHHEKHS DGLACTLLYPAPKRDRTSSEL RMDPSFDIREIDRTEIVMKHKLGSQG  | 293          |
| Hs | TLAELVHHHSTVADGLVTTLHY PAKCNKPT-VYGVSP IHDKWEMERTDI TMKHKLGGGQ  | 277          |



|    |                                                               |      |
|----|---------------------------------------------------------------|------|
| Hs | -----                                                         | 542  |
| Mm | REMENQPHKKY-----ELTGLPEQDRMA-MTLP---RNCQRSKLQLERTVSTSSQPEENV  | 724  |
| Fh | -----                                                         | 727  |
| Dm | -----                                                         | 517  |
| Ce | -----                                                         | 507  |
| Sm | QSNNGSLSNNSNSTPFSVPSVMSSSAIFPSSRQFSYVDPIPLDNSLTRSICPDRLISPLA  | 829  |
| Hs | -----                                                         | 542  |
| Mm | DRANDMLPKKSEE-----GAAPA-RE-----RPKAKLLPRG----ATALPLR          | 761  |
| Fh | -----                                                         | 727  |
| Dm | -----                                                         | 517  |
| Ce | -----                                                         | 507  |
| Sm | PPTPSKHVQLSSKSPALSKSTVNSDLNKTN-PVVDDCHNKRSMDSNFLNESYSGNNVSS   | 888  |
| Hs | -----                                                         | 542  |
| Mm | APDPAIT---ESDSPGVGVAGVAAAPKGGKERNGGTRLGVAGVPEDGEQLGWSSPAKAVAV | 818  |
| Fh | -----                                                         | 727  |
| Dm | -----                                                         | 517  |
| Ce | -----                                                         | 507  |
| Sm | KPNVHPTN----ISSSV-----FOE-ELDRDLKQHSQ-QLK-SSS--QOKPITPKT      | 930  |
| Hs | -----                                                         | 542  |
| Mm | LPTTHNHKVPVLISPTLKHTPADVQLIGTDSQGNKFKLLSEHQVTSSGDKDRPRRVKPKC  | 878  |
| Fh | -----                                                         | 727  |
| Dm | -----                                                         | 517  |
| Ce | -----                                                         | 507  |
| Sm | VPNNPCN--VTNSVMCNQEKSDSKSSVSNSSPYFTIPRLRPPPRSANPPLISSNNTSGS   | 988  |
| Hs | -----                                                         | 542  |
| Mm | APPPPPVMRLLQHPSTCSDPEEEPT-----APPAGQHTPETQEGG-KKA             | 921  |
| Fh | -----                                                         | 727  |
| Dm | -----                                                         | 517  |
| Ce | -----                                                         | 507  |
| Sm | SNNQMSTRGKV----EPPHCSSELIRSLASTQIKNDNASNSTV-TTTSKLPTNINSNNN   | 1042 |
| Hs | -----                                                         | 542  |
| Mm | APGPMPPSSGKPGRPVMPPPQVP-LPTSSISPAMANGTAGTKVALRKTQAAEKISAD--   | 978  |
| Fh | -----                                                         | 727  |
| Dm | -----                                                         | 517  |
| Ce | -----                                                         | 507  |
| Sm | NSPKPHFKRSENEISDKLSDIIQRLSWTGPTDDNSAGNQKRSQRLYLPTILSTSSTALD   | 1102 |
| Hs | -----                                                         | 542  |
| Mm | ----KISKEALLECADLLSSAITEPV---P-----                           | 1001 |
| Fh | -----                                                         | 727  |
| Dm | -----                                                         | 517  |
| Ce | -----                                                         | 507  |
| Sm | ETNGNHNHCVPTKYHLKKHLSNILKELERLIRMNDKKIPGNITSSPSSAAISSSSSTSNI  | 1162 |
| Hs | -----                                                         | 542  |
| Mm | -----N                                                        | 1002 |
| Fh | -----                                                         | 727  |
| Dm | -----                                                         | 517  |
| Ce | -----                                                         | 507  |

|    |                                                              |      |
|----|--------------------------------------------------------------|------|
| Sm | EQLIELADQMEACRLSCSAYIDQATCSARAKFNFRDRFSCLQTFSSLLRSKRLDSICNNN | 1222 |
| Hs | -----                                                        | 542  |
| Mm | SQLV---DTGHQLLDYCSGYVDSIP-QTRNKFAFREAVSKLELSLQELQVS---STA--- | 1052 |
| Fh | -----                                                        | 727  |
| Dm | -----                                                        | 517  |
| Ce | -----                                                        | 507  |
| Sm | TSNLSKYKNKNTNLLKDAENAIKEIINDLDKLTDNVNTTLTLETTLNNSNFPEHKPNSNL | 1282 |
| Hs | -----                                                        | 542  |
| Mm | -AGVPGTNP---VLNNLLSCVQEI-----SDVVQR-----                     | 1078 |
| Fh | -----                                                        | 727  |
| Dm | -----                                                        | 517  |
| Ce | -----                                                        | 507  |
| Sm | ATSNQSNLTCTENLSITDNRSATVFT                                   | 1308 |
| Hs | -----                                                        | 542  |
| Mm | -----                                                        | 1078 |

**Rac-alpha serine/threonine-protein kinase (Akt1):**

|    |                                                                 |              |
|----|-----------------------------------------------------------------|--------------|
| Ce | -----                                                           | 0            |
| Fh | -----                                                           | 0            |
| Sm | MEILCNYSQNPVVGSSKSSHTEHEPVSVSQAKVQDITASQRRNINCTSSNIFSSLQNAHLP   | 60           |
| Hs | -----                                                           | 0            |
| Mm | -----                                                           | 0            |
| Dm | -----                                                           | 0            |
| Ce | -----MSMT-SLSTKSRRQEDVVIEGWLHKKGEHIR                            | 30           |
| Fh | -----                                                           | 0            |
| Sm | VVPNPVLFKNELTENYSNLTTPRISPYPYLLGMLQCRPVSPLPLTRNVVKEGWLTKRGEHIK  | 120          |
| Hs | -----MSDVAIVKEGWLHHRGEYIK                                       | 20           |
| Mm | -----MNDVAIVKEGWLHHRGEYIK                                       | 20           |
| Dm | -----MSINTTFDL---SSPSVTSGHALTEQTQVVKEGWLTKRGEHIK                | 40           |
| Ce | NWRPRYFMI FNDGALLGFRAKPKEGQP--FPEPLNDFMIKDAATMLFEKPRPNMFMVRCL   | 88           |
| Fh | -----                                                           | 0            |
| Sm | NWRRRYFKLREDGTFYGYKI QPKDDMA---QPLNNFTVRDCQI ICLNPKPKPYTFILIRGL | 176          |
| Hs | TWRPRYFLLKNDGTFYGYKERPQDVDQ--REAPLNNFSVAQCQLMKTERPRPNTFFIIRCL   | 78           |
| Mm | TWRPRYFLLKNDGTFYGYKERPQDVDQ--RESPLNNFSVAQCQLMKTERPRPNTFFIIRCL   | 78           |
| Dm | NWRQRYFVLHSDGRLMGYRSKPADSASTPSDFLLNNFTVRGCQIMTVDRPKPFTFFIIRGL   | 100          |
| Ce | QWTTVIERTFYAESAEVRQRWIHAIESISKKYKGTNANPQEELMETNQPKIDEDSEFAG     | 148          |
| Fh | -----                                                           | 0            |
| Sm | QWTNVVERLFFVETEAERNYWLSAIQSVANRLKSSFEQPVSV---HN-----            | 220          |
| Hs | QWTTVIERTFHVETPEEREETTAIQTVADGLKQEEEEEMDF---RSGSP-----          | 125          |
| Mm | QWTTVIERTFHVETPEEREETATAIQTVADGLKRQEEETMDF---RSGSP-----         | 125          |
| Dm | QWTTVIERTFAVESELERQQWTEAIRNVSSRLIDVGEVAMTP---SEQTDMTDVDM--AT    | 155          |
|    |                                                                 |              |
|    |                                                                 | <b>S_TKc</b> |
| Ce | AAHAIMGQPSSGHGDNCSIDFRASMI SIADTSEAAKRDKITMEDDFDLKVLGKGTFGKVI   | 208          |
| Fh | -----MDTLPN-EIQVSI                                              | 12           |
| Sm | -----LNLAENMI---VDIPQRPVKRYSVNDFRLLKVLGKGTFGKVI                 | 259          |
| Hs | -----SDNSGAEEM---EVSLAKPKHRVTMNEFEYLKLLGKGTFGKVI                | 165          |
| Mm | -----SDNSGAEEM---EVSLAKPKHRVTMNEFEYLKLLGKGTFGKVI                | 165          |
| Dm | -----IAEDELSEQFSVQGTTCNSSGVKKVTLLENFEFLKVLGKGTFGKVI             | 200          |

: . \* : : \*

**S\_TKc**
